# 1 **Prophage-encoded small protein YqaH counteracts the activities of the** 2 **replication initiator DnaA in *Bacillus subtilis*.**

3 **Magali Ventroux and Marie-Francoise Noirot-Gros\***

4 Université Paris-Saclay, INRAE, AgroParisTech, Micalis Institute, 78350, Jouy-en-Josas, France.

5 **\* Correspondence:**

6 marie-francoise.noirot-gros@inrae.fr

7 **Keywords:** small ORF, SEP, Skin element, DnaA, Spo0A, *B. subtilis*

8

## 9 **Abstract**

10 Bacterial genomes harbor cryptic prophages that are mostly transcriptionally silent with many  
11 unannotated genes. Still, cryptic prophages may contribute to their host fitness and phenotypes. In *B.*  
12 *subtilis*, the *yqaF-yqaN* operon belongs to the prophage element *skin*, and is tightly repressed by the  
13 Xre-like repressor *sknR*. This operon contains several short open reading frames (smORFs)  
14 potentially encoding small-sized proteins. The smORF-encoded peptide YqaH was previously  
15 reported to bind to the replication initiator DnaA. Here, using a yeast two-hybrid assay, we found that  
16 YqaH binds to the DNA binding domain IV of DnaA and interacts with Spo0A, a master regulator of  
17 sporulation. We isolated single amino acid substitutions in YqaH that abolished interaction with  
18 DnaA but not with Spo0A. Then, we studied in *B. subtilis* the phenotypes associated with the specific  
19 loss-of-interaction with DnaA (DnaA-LOI). We found that expression of *yqaH* carrying DnaA-LOI  
20 mutations abolished the deleterious effects of *yqaH* WT expression on chromosome segregation,  
21 replication initiation and DnaA-regulated transcription. When YqaH was induced after vegetative  
22 growth, DnaA-LOI mutations abolished the deleterious effects of YqaH WT on sporulation and  
23 biofilm formation. Thus, YqaH inhibits replication, sporulation and biofilm formation mainly by  
24 antagonizing DnaA in a manner that is independent of the cell cycle checkpoint Sda.

25

## 26 **1 Introduction**

27 smORFs encoded peptides (SEPs) have emerged as a new class of small proteins widespread in both  
28 in eukaryotic and prokaryotic genomes (Albuquerque et al., 2015; Couso and Patraquim, 2017;  
29 Hellens et al., 2016; Samayoa et al., 2011; Storz et al., 2014). Due to their small size (for the smallest  
30 <30 aa or microproteins up to 100 aa) SEPs have often been overlooked during genome annotation.  
31 However, with advanced computation and ribosome profiling-based biochemical methods, small  
32 proteins are being now more widely identified and some have been functionally characterized (Chu et  
33 al., 2015; He et al., 2018; Makarewich and Olson, 2017; Samayoa et al., 2011; Straub and Wenkel,  
34 2017; VanOrsdel et al., 2018). Growing evidence indicates that smORFs often encode bioactive

35 peptides (Chu et al., 2015; Saghatelian and Couso, 2015). However, their contribution to cellular  
36 functions remains largely unexplored.

37 Small proteins act as regulators of diverse cellular processes in eukaryotes (Staudt and Wenkel,  
38 2011). In plants, characterized small proteins regulate transcription factors by sequestering them into  
39 nonfunctional states, preventing DNA binding or transcriptional activation (Dolde et al., 2018; Graeff  
40 and Wenkel, 2012). In *Drosophila melanogaster*, smORFs represent about 5% of the transcriptome  
41 and play an important role in controlling *Drosophila* development by triggering post-translational  
42 processing of transcriptional regulators (Albuquerque et al., 2015; Zanet et al., 2015). In human,  
43 SEPs have been discovered with specific subcellular localization, suggesting they can fulfill  
44 biological functions (Slavoff et al., 2013). For instance, a 69 aa long peptide, MRI-2, has been  
45 described to play a role in stimulating DNA repair through binding to the DNA end-binding protein  
46 complex Ku (Slavoff et al., 2014). smORFs represent about 2% of the genome of *S. cerevisiae* (Erpf  
47 and Fraser, 2018). Their function remains largely elusive but few have been identified to play  
48 regulatory roles in diverse physiological processes such as iron homeostasis (An et al., 2015) or DNA  
49 synthesis (Chabes et al., 1999; Erpf and Fraser, 2018; Lee et al., 2008). Genomic analysis of the *S.*  
50 *cerevisiae* revealed that a substantial fraction of smORFs is conserved in other eukaryotes even as  
51 phylogenetically distantly related as humans, thus emphasizing their biological significance  
52 (Kastenmayer et al., 2006).

53 In Prokaryotes, small proteins are encoded by 10 to 20% of sRNA in average, and are often species-  
54 specific (Friedman et al., 2017; Miravet-Verde et al., 2019; VanOrsdel et al., 2018; Yang et al., 2016;  
55 Zuber, 2001). SEPs with characterized functions are involved in various cellular processes (Storz et  
56 al., 2014). In *P. aeruginosa*, PtrA (63 aa long) and PtrB (59 aa long) repress the type III secretion  
57 system in response to DNA stress (Ha et al., 2004; Wu and Jin, 2005). In *E. coli*, the 43 aa long  
58 peptide SgrT interferes with the PTS glucose transport system allowing cells to utilize alternative  
59 non-PTS carbon sources to rapidly adapt to environmental changes in nutrient availability (Lloyd et  
60 al., 2017). In *B. subtilis*, SEPs participate in regulating cell division and stress responses (Ebmeier et  
61 al., 2012; Handler et al., 2008; Schmalisch et al., 2010). A compelling example is the recently  
62 characterized developmental regulator MciZ (mother cell inhibitor of FtsZ), a 40 aa long peptide  
63 which prevents cytokinesis in the mother cell during sporulation (Araujo-Bazan et al., 2019; Bisson-  
64 Filho et al., 2015). In this bacteria, about 20% of the total core protein of the mature spores is  
65 composed by the small acid-soluble spore proteins (SASPs) playing an important role in protecting  
66 DNA in the dormant spores (Moeller et al., 2008; Setlow, 2007). Notably, several smORFs identified  
67 in intergenic regions were reported to be expressed during sporulation (Schmalisch et al., 2010). The  
68 sporulation inhibitor *sda* encodes a 52 aa long protein, which acts as a checkpoint system  
69 coordinating DNA replication with sporulation initiation (Burkholder et al., 2001; Cunningham and  
70 Burkholder, 2009; Rowland et al., 2004). Sda binds to the primary sporulation kinase KinA,  
71 preventing its activation as well as the subsequent phosphorelay-mediated activation of the master  
72 sporulation regulator Spo0A (Cunningham and Burkholder, 2009; Veening et al., 2009). By linking  
73 DNA replication to a phosphorylation-dependent signaling cascade that triggers cellular  
74 development, this system illustrates an important biological role played by a SEP in blocking  
75 sporulation in response to DNA stress in *bacillus* (Veening et al., 2009).

76 Small proteins encoded by phage or by prophage-like regions of bacterial genomes can hijack the  
77 host cellular machineries, as part of a strategy to shift host resources toward the production of viral  
78 progeny (Duval and Cossart, 2017; Liu et al., 2014a, b). The bacteriophage T7 gene 2 encodes the  
79 64 aa long gp2 protein essential for infecting *E. coli*. Studies of its biological role revealed that gp2  
80 inhibits bacterial transcription by binding to RNA polymerase (RNAP), promoting a host-to-viral  
81 RNAP switch (Nechaev et al., 2003; Savalia et al., 2010). Another illustration is the 52 aa long  
82 protein ORF104 of phage 77 infecting *S. aureus*. ORF104 is able to interfere with the host  
83 chromosome replication by binding to the ATPase domain of the helicase loader protein DnaI, thus  
84 preventing the loading of the DNA helicase DnaC (Hood and Berger, 2016; Liu et al., 2004).

85 In bacteria, DNA replication is initiated by the conserved initiator protein DnaA that assembles to the  
86 chromosomal replication origin to elicit local DNA strand opening (Hwang and Kornberg, 1992;  
87 Leonard and Grimwade, 2011; Mott and Berger, 2007; Ozaki and Katayama, 2009). This step  
88 triggers the coordinated assembly of the proteins that will further built a functional replication fork,  
89 from the DNA helicase, unwinding the DNA duplex, to the many components of the replisome that  
90 form the replication machinery (Messer, 2002). In addition to its initiator activity, DnaA acts as a  
91 transcription factor repressing or activating genes (Goranov et al., 2005; Messer and Weigel, 2003;  
92 Washington et al., 2017). The activity of the initiator DnaA is tightly controlled to coordinate  
93 chromosomal replication initiation with other cellular processes during the bacterial cell cycle  
94 (Katayama et al., 2010; Scholefield and Murray, 2013). Part of this control is mediated by protein-  
95 protein interactions and involves various protein regulators that bind DnaA and affect its activity  
96 (Felicori et al., 2016a; Jameson and Wilkinson, 2017; Katayama et al., 2017; Riber et al., 2016;  
97 Skarstad and Katayama, 2013). In *B. subtilis*, four proteins SirA, Soj, DnaD and YabA have been  
98 identified to regulate DnaA activity or its assembly at *oriC* through direct interaction (Bonilla and  
99 Grossman, 2012; Felicori et al., 2016a; Martin et al., 2019; Murray and Errington, 2008).

100 Phage SEPs targeting essential functions for bacteria survival are regarded as promising  
101 antimicrobial peptides, and ignited a strong interest in their identification and characterization (Hood  
102 and Berger, 2016; Liu et al., 2004). The phage-like element Skin of *B. subtilis* encodes about 60  
103 proteins. The Skin element is repressed under most physiological conditions (Nicolas et al., 2012),  
104 silenced by the Skin repressor SknR (Figure 1A) (Kimura et al., 2010). Excision of Skin from the  
105 genome restores the integrity of the *sigK* gene encoding the late sporulation factor  $\sigma^K$  (Kunkel et al.,  
106 1990). Among the Skin ORFs, *yqaH* encodes the 85 aa long polypeptide YqaH previously identified  
107 to bind to the replication initiator protein DnaA in a yeast two-hybrid genomic screen (Noirot-Gros et  
108 al., 2002; Marchadier et al., 2011). When *yqaH* is overexpressed, *Bacillus* cells exhibits aberrant  
109 nucleoid morphological defects suggestive of replication deficiency (Kimura et al., 2010). In this  
110 study, we further characterized the function of *yqaH* in antagonizing DnaA activities. In addition, we  
111 found that YqaH also interacts with the master regulator Spo0A involved in developmental  
112 transitions to sporulation and biofilm formation (Dubnau et al., 2016). As DnaA, Spo0A is a DNA-  
113 binding protein, which, in its activated phosphorylated form (Spo0A-P), controls the expression of  
114 numerous genes during the early stages of sporulation (Molle et al., 2003). To better understand the  
115 biological role of this smORF in *B. subtilis* we performed the functional dissection of YqaH. Using a  
116 reverse yeast two-hybrid system, we selected *yqaH* alleles that selectively disrupted the YqaH/DnaA

117 complex. This approach allowed us to link specific DnaA loss-of-interaction with loss-of-function  
118 phenotypes related to replicative stress. Interestingly, it also highlighted an intricate role of both  
119 DnaA and Spo0A in YqaH-mediated sporulation phenotypes.

120

## 121 **2 Material and Methods**

### 122 **2.1 Strains, plasmids and primers**

123 Experiments were performed in *B. subtilis* strains 168 or BSBA1 (168 trpC2). *S. cerevisiae* PJ69-4a  
124 or  $\alpha$  strains were used for yeast-two-hybrid experiments (James et al., 1996). All strains are listed in  
125 Supplementary Table S1A. *E. coli* strain DH10B (Durfee et al., 2008) was used as a cloning host.  
126 Bacterial plasmids constructs are listed in Supplementary Table S1B. Primers are listed in  
127 Supplementary Table S2. Sequences of interest cloned or mutated in this study were verified by DNA  
128 sequencing.

### 129 **2.2 Bacteria growth**

130 Experiments were conducted at 37°C in LB medium containing the necessary antibiotics such as  
131 ampicillin 100 µg/ml (in *E. coli*), spectinomycin 60 µg/ml, kanamycin 5 µg/ml, chloramphenicol 5  
132 µg/ml or erythromycin 1 µg/ml associated with lincomycin 25 µg/ml (for *B. subtilis*). *B. subtilis*  
133 strains containing pDG148 and pDG148-*yqaH* plasmids were grown overnight in LB containing  
134 kanamycin. To investigate the effect of *yqaH* expression during exponential phase, ON cultures were  
135 diluted at OD<sub>600</sub> = 0.01 onto fresh LB (+Kn) media and grown to mid-exponential phase (OD<sub>600</sub> 0.3-  
136 0.4). The cultures were then further diluted in LB (+Kn) media containing IPTG 0.5 mM at OD<sub>600</sub> =  
137 0.01 and 200 µl of cultures were then transferred into a in 96 wells microplate reader to monitor  
138 OD<sub>600</sub> at 37°C for 18 hrs.

### 139 **2.3 Strains constructions**

140 *yqaH* expression:

141 The *yqaH* wild type and mutated gene derivatives were PCR-amplified using the *yqaH-HindIII-RBS-*  
142 *F/pYqaH-R* primer pair and inserted in plasmid pDG148 between HindIII and Sall restriction sites to  
143 place *yqaH* under control of the IPTG-inducible *Pspac* promoter (Stragier et al., 1988). The plasmid  
144 constructs were then extracted from *E. coli* and transformed into *B. subtilis*. Expression of YqaH WT  
145 and mutated proteins were assessed using the 3Flag-fusions.

146 *Yeast two-hybrid plasmid constructs:*

147 Genes encoding full size YqaH, Spo0A, YabA and DnaA were translationally fused to the activating  
148 domain (AD) or the binding domain (BD) of the transcriptional factor Gal4 by cloning into pGAD  
149 and pGBDU vectors, respectively (James et al., 1996). DNA fragments were amplified by PCR using  
150 appropriated primer sets (Table S2), double digested by EcoR1 and Sall and ligated to corresponding  
151 pGAD or pGBDU linearized vector to generate a translational fusion with Gal4-AD or BD domains.

152 pGAD- and pGBDU- plasmid derivatives were selected onto SD media lacking leucine (SD-L) or  
153 Uracyl (SD-U), respectively (James et al., 1996) Plasmid constructs were first transformed into *E. coli*  
154 prior to be introduced in the haploid yeast strain PJ69-4 $\alpha$  (pGAD-derivatives) or PJ69-4a (pGBDU-  
155 derivatives). Truncated *dnaA* fragments (boundaries as illustrated figure 1D) were translationally  
156 fused to the AD of Gal4 by gap repair recombination in yeast (Weir and Keeney, 2014). DNA  
157 fragments were amplified by PCR using appropriated primer sets (Table S2) to generate 50 pb of  
158 flanking homology with the linearized recipient vector pGAD on both side of the *dnaA* fragments.  
159 PJ69-4 $\alpha$  was co-transformed with the PCR fragments containing the truncated *dnaA* domains and  
160 linearized pGAD to give rise to pGAD-truncated *dnaA* fusions by in-vivo recombination.  
161

## 162 2.4 Sporulation conditions

163 Sporulation of *B. subtilis* was induced by nutrient limitation and re-suspension in Sterlini-  
164 Mandelstam medium (SM) (Sterlini and Mandelstam, 1969). The beginning of sporulation ( $t_0$ ) is  
165 defined as the moment of re-suspension of the cells in SM medium. To study the effects of *yqaH*  
166 overexpression on *B. subtilis* sporulation, ON cultures of strains containing the pDG148  
167 constructions were diluted in CH medium at starting OD<sub>600</sub> of 0.05. When cultures reached an  
168 OD<sub>600</sub>=1, cells were re-suspended in an equivalent volume of SM medium complemented with  
169 0.5mM IPTG ( $t_0$ ). To monitored sporulation efficiency, cells were collected at different times after  
170 sporulation induction ( $t_0$ ) until  $t_6$  (6 hours after induction, defined as a stage of production of mature  
171 spores) and  $t_{18}$ . Asymmetric septa and spores were enumerated by microscopic observations from all  
172 samples.

## 173 2.5 Yeast two-hybrid assay

174 The yeast two-hybrid assays were performed as described (Marchadier et al., 2011; Noiro-Gros et  
175 al., 2002; Noiro-Gros et al., 2006). PJ69-4a and  $\alpha$  haploid yeast strains transformed by pGAD- and  
176 pGBDU- plasmid derivatives were mixed onto YEPD-rich media plates to allow formation of  
177 diploids. Diploids containing both pGAD and pGBDU type of plasmids were then selected on SD-  
178 LU and interacting phenotypes were monitored by the ability of diploids to grow on SD-LUHA  
179 medium further lacking histidine (H) or adenine (A).

## 180 2.6 Generation of Loss of Interaction (LOI) mutation

181 *YqaH*\_LOI mutants were identified using a yeast two-hybrid-based assay as described elsewhere  
182 (Felicori et al., 2016a; Natrajan et al., 2009; Noiro-Gros et al., 2006; Quevillon-Cheruel et al., 2012).  
183 Random mutagenesis of the targeted genes was achieved by PCR amplification under mutagenic  
184 conditions that promotes less that one miss-incorporation per amplification cycle (Felicori et al.,  
185 2016a). For *yqaH*, a library of mutated pGAD-*yqaH*\* was constructed by gap-repair recombination  
186 into yeast (PJ69-4 $\alpha$  strain). About 1000 individual transformants were organized in 96-wells format  
187 on plates containing a defined medium lacking leucine (-L) to form an arrayed collection of AD-  
188 *yqaH*\* gene fusion mutants. This organized library was then mated with PJ69-4a strains containing  
189 either pGBDU-*dnaA* or pGBDU-*spo0A*, or an empty pGBDU plasmid as a negative control.

190 Selective pressure for interacting phenotypes was then applied on media lacking –LUH or –LUA.  
191 Diploids that failed to grow on interaction-selective media were considered as potentially expressing  
192 a loss-of-interaction (LOI) mutant of *yqaH*. Importantly, any particular AD-YqaH\*<sub>LOI</sub> proteins  
193 unable to trigger interacting phenotypes in the presence of BD-DnaA while still producing interacting  
194 phenotypes when expressed in the presence of BD-Spo0A is defined as a DnaA-specific LOI mutant.  
195 The corresponding *yqaH*<sub>LOI</sub> genes were retrieved from the initially organized haploid library and  
196 the mutations identified by DNA sequencing. Only mutations resulting from single substitutions were  
197 considered.

## 198 **2.7 Ori/Ter ratios determination**

199 The ratios of origin-proximal and terminus-proximal DNA sequences were determined by qPCR. ON  
200 cultures of *B. subtilis* strains containing pDG148 or pDG148-*yqaH* plasmid derivatives were first  
201 diluted to OD<sub>600</sub> = 0.01 in LB supplemented with kanamycin (5 µg/ml) and grown at 37°C in up to  
202 mid-exponential phase (OD<sub>600</sub> = 0.3 to 0.4). Then the cultures were secondly diluted at OD<sub>600</sub>=0.02  
203 in LB + Kanamycin media supplemented with IPTG 0.5 mM and grown again at 37°C. Culture  
204 samples were collected and mixed with 1/2 volume of sodium azide solution (5mM final) to stop all  
205 metabolic activities prior subjecting them to total lysis. Total genomic DNA extracts were aliquoted  
206 and kept at -80°C and thawed aliquots were used only once. Quantitative real time PCR were  
207 performed on a Mastercycler® ep realplex (Eppendorf) thermocycler device using Absolute™ Blue  
208 QPCR SYBR® Green ROX Mix (ABgene), to amplify specific origin (ORI) or terminus (TER)  
209 proximal sequences. Primers used for sequence amplification were chosen using Primer3Plus  
210 program (<http://www.bioinformatics.nl/cgi-bin/primer3plus/primer3plus.cgi/>). Amplification using  
211 the ORI pair of primers (oriL3F and oriL3R, Table S2) targeting the 4212889-4211510 region of the  
212 *B. subtilis* chromosome, yields a 128 bp size product corresponding to sequence at the left side of the  
213 origin. The terminus sequence is a 122 bp long fragment obtained from the TER pair of primers  
214 (terR3F and terR3R, Table S2) amplifying the region 2016845-2017711 at the right side of the  
215 terminus. The two primer pairs ORI and TER exhibited ≥ 95% of amplification efficiency. Data  
216 analysis was performed using the software Realplex (Eppendorf) and the quantification with the  
217 ΔΔCt method.

## 218 **2.8 Gene expression analysis by qPCR**

219 To monitor the expression of the DnaA-regulated genes *dnaA* and *sda*, samples of cultures (as  
220 collected for Ori/Ter ratios measurements) were harvested in exponential growth at OD<sub>600</sub> = 0.3-0.4,  
221 and RNA extractions were performed. To quantify the expression Spo0A-regulated genes *spoIIE* and  
222 *spoIIGA* cells were harvested at stages t2-t3 of sporulation (*t*<sub>2,5</sub>) in SM medium. In both case, a  
223 determined volume of culture was mix with 1/2 volume of sodium azide solution (5mM final), then  
224 collected by centrifugation and subjected to lysis followed by total RNA extraction as described  
225 (Nicolas et al., 2012). Total RNA was reverse transcribed and quantitative real time PCR were  
226 performed on cDNA. Primers used for sequence amplification were chosen using Primer3Plus  
227 program (<http://www.bioinformatics.nl/cgi-bin/primer3plus/primer3plus.cgi/>) and are detailed in  
228 Table S2. The couples of primers exhibited ≥ 95% amplification efficiency. Data analysis was  
229 performed using the software Realplex (Eppendorf) and the quantification with the ΔΔCt method.

230

## 231 **2.9 Real-time in vivo monitoring of *spoIIG* gene expression by luminescence**

232 The promoter of *spoIIG* fused to the firefly luciferase gene *luc* (Mirouze et al., 2011) was transferred  
233 in the BSBA1 background strains by transformation with total genomic DNA. Cell growth was  
234 monitored in a 96-wells microplate under agitation at 37°C using microplate reader (Biotek  
235 Synergy2). Luminescence as well as OD<sub>600</sub> were recorded every 5 min. Luminescence signals were  
236 expressed as Relative Luminescence Units (RLU) normalized to the bacterial OD. For monitoring  
237 *spoIIG* expression during sporulation, precultures of strains harboring plasmid pDG148-*yqaH* wild-  
238 type and mutated derivatives were first performed in LB supplemented with Kanamycin (10 µg/ml)  
239 overday. Cells from precultures were then inoculated in CH media at very high dilution so they can  
240 reach an OD<sub>600</sub>=1 after 12 hrs (ON). Then cells were resuspended in SM medium supplemented  
241 with 0.5 mM IPTG and inoculated in microliter plates in the presence of luciferin (1.4 mg/ml). The  
242 cultures were incubated at 37°C under agitation in a plate reader equipped with a photomultiplier for  
243 luminometry. Relative Luminescence Unit (RLU) and OD<sub>600</sub> were measured at 5 min intervals.

## 244 **2.10 Fluorescence microscopy**

245 Cells were harvested and rinsed in a minimal transparent media, stained with FM4-64 dye (to stain  
246 the bacterial membranes) and DAPI (to stain the nucleoids) prior to be mounted onto 1.2% agarose  
247 pads. Fluorescence microscopy was performed on a Leica® DMR2A (100X UplanAPO objective  
248 with an aperture of 1.35) coupled with CoolSnap HQ camera (Roper Scientific). System control and  
249 image processing were achieved using Metamorph software (Molecular Devices, Sunnyvale, CA,  
250 USA). Counts of cells, spores, foci or nucleoids were determined with the ImageJ® software, from at  
251 least 500 cells.

## 252 **2.11 Biofilm assay**

253 Production and analysis of air-to-liquid biofilm pellicles were performed as already described (Garcia  
254 Garcia et al., 2018). Briefly, strains expressing *yqaH*, wild type or K17E mutant derivative as well as  
255 control strain were grown in LB to OD<sub>600</sub> of 1.0 and inoculated in 12-wells culture plates containing  
256 3.5 ml of MSgg media at starting OD<sub>600</sub> = 0.1. Cultures were maintained at 28°C and 70% humidity,  
257 with no agitation. After 48 hours, wells were filled out with MSgg media (slowly added at the edge)  
258 to lift the biofilm pellicles up to the top of the wells. The pellicles were then peeled-off onto a 2.5 cm  
259 diameter circular cover slide. The cover slides with intact biofilm pellicles were mounted onto an  
260 Attofluor Cell Chamber and stained with the Film Tracer FM 1-43 Green Biofilm dye (Thermo  
261 Fisher Scientific). Stained biofilms were observed using a spinning disk confocal microscope [Nikon  
262 Eclipse Ti-E coupled with CREST X-Light™ confocal imager; objectives Nikon CFI Plan Fluor  
263 10X, DIC, 10x/0.3 NA (WD = 16 mm); excitation was performed at 470 nm and emission recorded  
264 at 505 nm]. Images were processed using IMARIS software (Bitplane, South Windsor, CT, United  
265 States). Biofilm images were quantified using the surface function in IMARIS (XTension biofilm) to  
266 derived biovolumes (total volume (µm<sup>3</sup>) per area (µm<sup>2</sup>)), cohesiveness (number of discontinuous  
267 components in the area) and mean thickness (µm). Parameters were averaged from 8 samples.

268 Pairwise comparisons were performed using the Tukey Method (\* $p \leq 0.05$  \*\* $p \leq 0.01$   
269 \*\*\* $p \leq 0.001$ ).

## 270 **2.12 Protein immunodetection**

271 Production of 3FLAG-YqaH mutated derivatives was determined from total protein extract of *B.*  
272 *subtilis* by immunodetection using monoclonal antibody anti-FLAG<sup>®</sup> M2 (Sigma). An IgG goat  
273 secondary antibody (Sigma) peroxidase conjugated was used at 1/10000e to detect the anti-FLAG<sup>®</sup>  
274 M2. Protein immunodetections were performed using the Clarity Western ECL kit (Biorad)  
275 according to the supplier's indications followed by chemiluminescence detection (ChemiDoc imager,  
276 Biorad). Images were analysed with the software Image Lab<sup>™</sup>.

## 277 **2.13 Structure predictions**

278 Secondary structures predictions were performed with the computer server Jpred 3  
279 (<http://www.compbio.dundee.ac.uk/www-jpred/>) and the 3D structure was predicted using Alphafold  
280 (Jumper et al., 2021) (<https://alphafold.ebi.ac.uk>).

281

# 282 **3 Results**

## 283 **3.1 Skin element smORF-encoded YqaH interacts with DnaA and Spo0A**

284 YqaH was originally identified to interact with the replication initiator DnaA in a yeast two-hybrid  
285 screen of a *B. subtilis* genomic library (Noirot-Gros et al., 2002). Interestingly, in a subsequent screen  
286 targeting the sporulation transcriptional factor Spo0A, we also identified YqaH as a binding partner  
287 (Figure 1B). Other DnaA-binding proteins such as SirA, Soj, DnaD and YabA exert regulatory  
288 functions by binding to different functional domains of DnaA (Figure 1B, D). We characterized the  
289 domain of DnaA able to elicit the interaction phenotypes with YqaH in a yeast two-hybrid binary  
290 assay. After testing several protein fragments spanning various DnaA domains, we delineated the C-  
291 terminal domain IV as necessary and sufficient for interaction with YqaH (Figure 1C, D). This 118  
292 aa long fragment spans residues 328 to 446, and carries the signature motif for DnaA-binding to  
293 double-stranded DNA. This result distinguishes YqaH from the other regulators SirA, Soj, YabA and  
294 DnaD that inhibit DnaA binding to *oriC*, through interacting with the central AAA+ ATPase domain  
295 III (Figure 1D). SirA is also inhibiting DnaA oligomerization by interacting with the domain I. The  
296 ability of YqaH to interact with two key players of bacterial vegetative growth and transition to  
297 sporulation development prompted us to further explore YqaH biological functions.

## 298 **3.2 *yqaH* expression triggers phenotypes similar to those of a DnaA mutant**

299 The interaction of YqaH with DnaA hints at a potential role in replication initiation control. We first  
300 investigated the effect of *yqaH* expression on cell growth and viability. All *B. subtilis* strains either  
301 carrying a plasmid expressing *yqaH* under control of an IPTG-inducible promoter or carrying a  
302 control plasmid without the *yqaH* gene were treated under identical conditions. Addition of IPTG at  
303 early exponential stage specifically halted cell growth after two hours in cells expressing *yqaH*



304 (Figure 2A). We found that cell viability was affected almost instantly in the presence of *yqaH*,  
305 leading to about 30-fold decrease after three hours (Figure 2A). Expression of *yqaH* also affects cell  
306 morphology leading to significant filamentation (Figure 2B). A closer examination of nucleoids  
307 revealed aberrant segregation of chromosomes with both diffused and compacted nucleoids  
308 unequally distributed within the filamented cells, as well as a large portion of cells with no DNA.  
309 Most importantly, septum-entrapped nucleoids were also observed, evocative of a nucleoid occlusion  
310 defect (Wu and Errington, 2011). These observations highlighted that the expression of *yqaH* from a  
311 plasmid triggered a large panel of chromosomal disorders evocative of a replication and/or  
312 segregation stress, as described previously (Kimura et al., 2010). Using an epitope-tagged YqaH  
313 protein, we showed that YqaH was immuno-detected in cells carrying the IPTG-inducible *yqaH* gene  
314 but not in control, indicating that the chromosomal copy of *yqaH* within the Skin element remained  
315 completely silent under our experimental conditions (Figure S3).

316 We then investigated the role of YqaH on DnaA-dependent transcriptional regulation. Among the  
317 genes of the DnaA-regulon, DnaA negatively regulates its own expression by binding to the *dnaA*  
318 promoter region (Goranov et al., 2005; Merrikh and Grossman, 2011; Washington et al., 2017). We  
319 monitored the *dnaA* mRNA levels in the presence or absence of YqaH and showed that expression of  
320 *yqaH* led to a 2-fold increase in *dnaA* mRNA, consistent with a regulatory defect. Taken together,  
321 these results are in agreement with a role of YqaH in counteracting DnaA activity.  
322

### 323 **3.3 *yqaH* expression impairs sporulation**

324 We investigated the possible role of YqaH in Spo0A functions, by examining the effect of *yqaH*  
325 expression on sporulation. Cells carrying either the control or the *yqaH*-inducible plasmids were  
326 induced into sporulation by the re-suspension method. To prevent an inhibitory effect of YqaH  
327 during vegetative growth, the *yqaH* gene expression was induced only at the onset of sporulation (t0)  
328 and spore formation was monitored over time. Appearance of asymmetric septa at early stage (t2,5)  
329 was imaged by fluorescent microscopy after staining by a red-fluorescent membrane-dye, while the  
330 engulfed forespore (t6 and t18) was revealed using bright field (Figure 3A). We observed that the  
331 counts of spore forming bacteria was drastically reduced in the presence of YqaH (Figure 3B). We  
332 also examined the effect of *yqaH* expression on Spo0A-mediated transcriptional regulation. Among  
333 genes under control of Spo0A are *spoIIE*, encoding the protein serine phosphatase SpoIIE, and  
334 *spoIIGA*, encoding a pro- $\sigma^E$  processing protease (Molle et al., 2003). SpoIIE and spoIIGA are  
335 involved in the activation of the alternative sporulation sigma factors  $\sigma^F$  and  $\sigma^E$  in the forespore and  
336 mother cell compartments, respectively (Baldus et al., 1994; Bradshaw et al., 2017; Errington and  
337 Wu, 2017; Fujita et al., 2005). Examination of their expression levels at the onset of sporulation  
338 revealed a significant downregulation (about 7- and 8-fold, respectively) in the presence of *yqaH*  
339 (Figure 3C). Altogether, these results pointed to a negative effect of YqaH during sporulation,  
340 supporting the notion that YqaH could act by inhibiting Spo0A activity.

341

### 342 **3.4 Functional dissection of YqaH**

343 To further decipher YqaH mode of action, we searched for *yqaH* point mutations able to separate its  
344 interactions with DnaA and Spo0A. Using a yeast two-hybrid based assay, we screened an *yqaH*  
345 mutant library for specific loss-of-interaction (LOI) phenotypes (Figure S1). This approach is based  
346 on the selection of single amino acid changes in YqaH that selectively disrupt the interaction with  
347 only one partner while preserving interaction with the other. Such a screening allows to identify  
348 substitutions at residues likely located at the interacting surface and preserving the overall 3D-  
349 structure of YqaH, leading to a LOI phenotype specific of the targeted partner and maintaining  
350 proficiency for interaction with another partner (Natrajan et al., 2009; Noirot-Gros et al., 2006;  
351 Quevillon-Cheruel et al., 2012). We identified three single-residue substitutions K17E, E38K and  
352 K48E in YqaH that elicited a complete loss-of-interaction phenotype with DnaA without affecting  
353 interaction with Spo0A (Figure S2A and B, Table 1). These three replacements were all charge-  
354 changing substitutions. Six additional substitutions affecting residues R16G, M27T, Y37H, E38V  
355 A44V and R56W were only partially abolishing interaction phenotypes with DnaA (Figure S2A,  
356 Table 1). Two substitutions, S25T and A40T were found to partially affect both interaction with  
357 DnaA and Spo0A, and 5 substitutions, D10G, S20L, L28P, L43P and L57P were totally abolishing  
358 interaction phenotypes with both DnaA and Spo0A (Figure S2A, Table1). In the latter case, these  
359 substitutions are likely to affect the overall YqaH 3D-structure integrity. Is it worthy of note that,  
360 although several specific DnaA-LOI mutants have been obtained, no substitution that specifically  
361 prevented interaction with Spo0A was identified in our screens. The YqaH protein structure is  
362 predicted to fold into two successive alpha helix (Figure S2B). The residues important for interaction  
363 with DnaA mapped within the two main helices, presumably involved in a coiled-coil structure.

364

### 365 **3.5 DnaA-LOI mutants of YqaH restore replication and transcriptional regulation defects** 366 **caused by *yqaH* overexpression**

367 We investigated the effect of two DnaA-LOI mutants of YqaH carrying substitutions K17E or R56W  
368 and exhibiting total (K17E) or partial (R56W) loss of interaction phenotypes in our yeast two-hybrid  
369 assay (Table 1). We first verified the YqaH mutant proteins production levels from the plasmid  
370 compared to the wild type (Figure S3). The cellular amount of YqaH-K17E in cells was similar to  
371 that of the WT, while the level of YqaH-R56W was lower. Examination of the nucleoid morphology  
372 shown that both substitutions abolished the nucleoid segregation and condensation defects resulting  
373 from expression of the wild-type *yqaH* observed in Figure 2B (Figure 4A). We further examined the  
374 effect of YqaH mutants on replication initiation by quantifying the chromosomal origin-proximal and  
375 terminus-proximal sequences (Figure 4B). The average of origin-to-terminus (*Ori/Ter*) ratio was  
376 determined by qPCR on genomic DNA harvested from exponentially growing cells as previously  
377 described (Soufo et al., 2008). The *Ori/Ter* ratio was about 4 in control cells that do not expressed  
378 *yqaH*, indicating that two events of replication initiation have taken place in most cells, in agreement  
379 with previous observations under similar experimental conditions (Murray and Koh, 2014). In the  
380 presence of *yqaH*, the *Ori/Ter* ratio dropped below 2, indicating that less than one replication  
381 initiation event per cell has taken place in average (Figure 4B). This observation suggests that the  
382 YqaH protein exerts a negative effect on replication initiation by counteracting DnaA activity. In the  
383 presence of *yqaH*\_DnaA LOI variants, the *Ori/Ter* ratio in the cell population was restored (Figure

384 4B). The average *Ori/Ter* ratio was similar to that in control cells upon expression of *yqaH-R56W*.  
385 However, expression of *yqaH-K17E* restored about 75% of the initiation rate indicating a partial  
386 although significant complementation. This difference between YqaH variants may be due to a  
387 differential loss of interaction with DnaA in cells. We decided to analyze further the number of  
388 chromosomal origins in individual cells using the YqaH-K17E mutant, which showed partial  
389 restoration of the *Ori/Ter* ratio and expression level similar to wild type YqaH. Cells carrying a *lacO*  
390 repeat array near the replication origin and expressing the GFP-LacI fusion were observed by  
391 fluorescence microscopy, in the presence or absence of YqaH (Figure 4C). In the absence of YqaH,  
392 the number of LacI foci per nucleoid was found to be 3.6 in average, in agreement with the *Ori/Ter*  
393 ratio (Figure 4D). This number dropped to 1 in average upon expression of *yqaH*, indicating a strong  
394 replication deficit. Cells expressing *yqaH* also exhibited expected aberrant nucleoids and segregation  
395 defects. Expression of *yqaH-K17E* mutant partially restored replication defects with an average of  
396 GFP-LacI foci about 2.3 and fully restored nucleoid and cell morphology. Together these  
397 observations indicate that YqaH antagonizes DnaA activity in replication initiation by binding to  
398 DnaA.

399 We also examined the effect of the DnaA-LOI mutants on *dnaA* mRNA abundance. We found that  
400 whereas expression of *yqaH* increased by 2-fold the abundance of *dnaA* mRNA relative to control,  
401 expression of *yqaH K17E* and *R56W* variants restored *dnaA* mRNA abundance to control level  
402 (Figure 5). This finding indicated that YqaH binding to DnaA also antagonized DnaA activity in  
403 transcriptional regulation.

404

### 405 **3.6 YqaH-mediated inhibition of sporulation and biofilm formation requires interaction with** 406 **DnaA.**

407 Although we did not identify any YqaH mutant that specifically lost interaction with Spo0A (Spo0A-  
408 LOI) in our yeast two-hybrid screen, we reasoned that the DnaA-LOI mutant YqaH-K17E which  
409 remains fully proficient for interaction with Spo0A, could still provide a way to investigate a  
410 potential effect of YqaH on sporulation phenotypes. Indeed, despite a slightly reduced *Ori/Ter* ratio,  
411 overexpression of *yqaH-K17E* allows normal vegetative cell growth without the DnaA-related  
412 chromosome segregation defects (Figure 4). We compared the sporulation efficiencies of strains  
413 expressing *yqaH* wild-type or the K17E variant. The percentage of cells with polar septum or  
414 engulfing spore was determined by microscopy at t6 (i.e stage VI, referred as the spore maturation  
415 stage). Surprisingly, we found that YqaH-K17E completely restored the sporulation defect mediated  
416 by YqaH WT (Figure 6A) suggesting that the interaction with DnaA could be also responsible for the  
417 loss of sporulation phenotype. To investigate further the potential role of YqaH in Spo0A-related  
418 processes, we also examined its effect on biofilm formation (Figure S4). We observed that the  
419 production of biofilm pellicles at the air-liquid medium interface was impaired in strains expressing  
420 *yqaH*, leading to a loss of biomass and cohesion. Damaged biofilm pellicles were not observed in  
421 cells expressing the DnaA-LOI mutant YqaH-K17E (Figure S4A, B). As *yqaH* expression also  
422 affects chromosome segregation and vegetative growth, this finding suggests an indirect role of  
423 DnaA during biofilm formation.

### 424 **3.7 The sporulation inhibitor Sda is not responsible for YqaH-mediated defects in sporulation**

425 In *B. subtilis*, most of the DnaA-mediated transcriptional regulation of sporulation genes is indirect  
426 and mediated by the protein Sda, as evidenced by genome-wide expression analysis (Washington et  
427 al., 2017). The Sda protein exerts a control over sporulation by inhibiting the phosphorylation  
428 activity of KinA, required to activate the sporulation regulator Spo0A (Burkholder et al., 2001;  
429 Washington et al., 2017). We investigated whether *sda* played a role in the YqaH-dependent defect in  
430 sporulation by examining the expression of the Spo0A-driven promoter P<sub>spoIIG</sub> fused with the firefly  
431 luciferase reporter gene (*luc*), in the presence or absence of *sda* (Figure 6 B-D). In the absence of  
432 YqaH, the expression of P<sub>spoIIG</sub>-*luc* increased with time to reach a maximum 3 hours after induction  
433 of sporulation in both *sda*<sup>+</sup> and  $\Delta$ *sda* backgrounds. A higher expression level is observed in the  $\Delta$ *sda*  
434 strain, in agreement with increased levels of Spo0A-P (Hoover et al., 2010) (Figures 6 B-D).  
435 Expression of *yqaH* led to a similar strong reduction of luminescence signal in both strains,  
436 illustrative of a *spoIIG* expression decrease (Figures 6B-D). This observation is corroborated by the  
437 strong reduction of sporulation efficiency in *sda*<sup>+</sup> and  $\Delta$ *sda* strains (Figures 6A, E). These results  
438 pointed to a *sda*-independent inhibition of sporulation mediated by YqaH. However, the decrease of  
439 *spoIIG* expression caused by YqaH WT was only partly compensated by the DnaA-LOI YqaH-K17E  
440 mutant, suggesting that interaction of YqaH with DnaA may have a moderate role in the inhibition of  
441 Spo0A activity. Yet, the K17E mutation fully abolished the YqaH-dependent sporulation defect in  
442 *sda*<sup>+</sup> and  $\Delta$ *sda* strains, as measured by the ratio of cells containing asymmetric septa or engulfed  
443 forespore 6 hours after initiation of sporulation (Figures 6A, E). Together these results indicated that  
444 *sda* was not involved in the DnaA-mediated response to sporulation and suggested a combined role  
445 of DnaA and Spo0A in YqaH-mediated sporulation phenotypes.

446

## 447 **4 Discussion**

448 Our study sheds light on some of the mechanisms of action of YqaH, a small protein with growth  
449 inhibition activities encoded by the *B. subtilis* Skin element. By physically interacting with two  
450 master regulators DnaA and Spo0A, YqaH is a multifunctional small peptide, with the potential to  
451 act on two key cellular processes. YqaH is able to counteract DnaA, which is essential during  
452 vegetative growth as replication initiator and transcriptional factor. YqaH is also interfering  
453 with Spo0A, which is an essential regulator of lifestyle transitions in response to changes in  
454 environmental conditions, including the transition from vegetative growth to sporulation.

455 In *Bacillus*, several regulatory proteins inhibit DnaA by targeting different functional domains of the  
456 protein. In cells committed to sporulation, the protein SirA prevents DnaA from binding to the  
457 replication origin *oriC* by interacting with its structural domains I and III (Jameson et al., 2014).  
458 During vegetative growth, the regulatory proteins YabA interacts with DnaA during most of the cell  
459 cycle (Felicori et al., 2016b; Noiro-Gros et al., 2006; Soufo et al., 2008). YabA as well as the  
460 primosomal protein DnaD affect DnaA cooperative binding to *oriC* by interacting with DnaA  
461 structural domain III (Merrikh and Grossman, 2011; Scholefield and Murray, 2013). Finally, the

462 ATPase protein Soj negatively regulates DnaA by also interacting with the structural domain III,  
463 preventing oligomerization (Scholefield et al., 2011). Our results indicate that YqaH controls DnaA  
464 activity by a mode distinct from the other known regulators, specifically by contacting the structural  
465 domain IV responsible for binding of the DnaA-binding-sites (DnaA-boxes) on the *Bacillus* genome  
466 (Fujikawa et al., 2003).

467 *B. subtilis* cells expressing *yqaH* exhibited various DnaA-related phenotypes that spanned from a  
468 general growth defect, aberrant nucleoid morphologies, impaired replication initiation and loss of  
469 transcriptional control. These cells also exhibited Spo0A-related phenotypes such as a dramatic  
470 reduction of sporulation efficiency, an inhibition of Spo0A-driven gene expression and a strong  
471 decrease in biofilm formation. These observations are in agreement with a role of YqaH in  
472 counteracting both DnaA and Spo0A activities during vegetative growth and sporulation. However, it  
473 is well documented that initiation of sporulation is closely coupled to the cell cycle and DNA  
474 replication to ensure that sporulation occurs only in cells containing two fully replicated  
475 chromosomes (Veening et al., 2009). The intricate relationship between DNA replication and  
476 sporulation makes it difficult to separate the DnaA-related phenotypes from those linked to Spo0A.  
477 By using YqaH single-point mutants unable to interact with DnaA but proficient for interaction with  
478 Spo0A, we identified a mutational pattern on YqaH (Figure S2) and confirmed the direct  
479 involvement of YqaH in various DnaA-related phenotypes, validating that loss-of-interaction caused  
480 loss-of-function in *Bacillus*. In our yeast two-hybrid screens, we did not obtain YqaH Spo0A-LOI  
481 mutants. Yet, by using YqaH DnaA-LOI mutants, we revealed that DnaA also play a role in  
482 sporulation and biofilm formation.

483 In *B. subtilis*, many genes regulated by DnaA are involved in sporulation and biofilm formation,  
484 illustrating the complexity of regulatory circuits that control lifestyle transitions (Washington et al.,  
485 2017). However, most of the effect of DnaA on gene expression is indirect and could be attributed to  
486 its transcriptional activation of the sporulation checkpoint gene *sda* (Washington et al., 2017). We  
487 showed that Sda was not involved in the sporulation phenotypes triggered by YqaH, as cells  
488 exhibited similar sporulation defects in the presence or absence of Sda (Figure 6).

489 Interestingly, the YqaH-K17E DnaA-LOI mutant separated the observed Spo0A-related phenotypes.  
490 Indeed, whereas overexpression of the *yqaH-K17E* mutant enabled total recovery of sporulation  
491 efficiency, it did not fully restore the activity of Spo0A-dependent promoter  $P_{spoIIIG}$  (Figure 6). This  
492 finding suggests that YqaH may partially or transiently antagonize Spo0A activity. Further  
493 investigation is necessary to fully characterize YqaH interaction with Spo0A.

494 In conclusion, our study validates the biological role of a small protein encoded by a prophage-like  
495 element in negatively interfering with a broad range of cellular processes by counteracting two  
496 master regulators DnaA and Spo0A. *yqaH*-homologs can be found in integrated prophages present in  
497 Gram-positive bacteria of the *Bacillus* and *Staphylococcus* genera, as well as in the Gram negative  
498 bacteria *D. acidirovans* (Figure S5). Defective prophages and integrated elements account for a large  
499 fraction of bacterial genomes and may contribute to gene diversity, bacterial adaptation, and fitness  
500 (Bobay et al., 2014; Casjens, 2003). In *B. subtilis*, the Skin element is under tight control by the Skin

501 repressor protein SknR. Its excision occurs in the mother cell at late stage of sporulation, leading to  
502 the reconstitution of the late sigma factor *sigK* governing the late stage of the sporulation program.  
503 The expression of YqaH and other antagonizing peptides in the mother cell could be part of a  
504 mechanism to ensure the inactivation of DNA replication and early stage regulatory components to  
505 improve the proper orchestration of forespore development. More generally, expression of phage-  
506 encoded functions targeting major cellular pathways is part of a general mechanism to redirect the  
507 host metabolism to the benefit of the phage.

## 508 **5 Acknowledgements**

509 This research has been funded by INRAE and received no specific grant from any funding agency in  
510 the public, commercial, or not-for-profit sectors. The authors are grateful to F. Lecointe for providing  
511 us with the FLB78 strain. We also thank P. Noirot and M-A Petit for their critical reading of the  
512 manuscript.

## 513 **6 Author contributions**

514 Supervision: MFNG; Conceptualization: MFNG., MV. Investigation and validation: MV. Formal  
515 analysis: MFNG., MV. Visualization: MFNG., MV. Writing, review and editing: MFNG., MV.

## 516 **7 Conflict of Interest**

517 The authors declare that the research was conducted in the absence of any commercial or financial  
518 relationships that could be construed as a potential conflict of interest.

## 519 **8 Supplementary material**

520 **Figure S1: Yeast two-hybrid screening of a *yqaH* gene mutant library for specific LOI**  
521 **phenotypes.**

522 **Figure S2: Mapping of DnaA-LOI mutations in *yqaH***

523 **Figure S3: Immunodetection of YqaH in cell extracts after induction**

524 **Figure S4: DnaA is involved in YqaH-mediated defects in biofilm formation**

525 **Figure S5: *yqaH* ORF conservation within phages species**

526 **Table S1: Strains and Plasmids**

527 **Table S2: Primers list**

528

## 529 **9 References**

530 Albuquerque, J.P., Tobias-Santos, V., Rodrigues, A.C., Mury, F.B., and da Fonseca, R.N. (2015).  
531 small ORFs: A new class of essential genes for development. *Genetics and molecular biology* 38,  
532 278-283.

- 533 An, X., Zhang, C., Sclafani, R.A., Seligman, P., and Huang, M. (2015). The late-annotated small  
534 ORF LSO1 is a target gene of the iron regulon of *Saccharomyces cerevisiae*. *MicrobiologyOpen* 4,  
535 941-951.
- 536 Araujo-Bazan, L., Huecas, S., Valle, J., Andreu, D., and Andreu, J.M. (2019). Synthetic  
537 developmental regulator MciZ targets FtsZ across *Bacillus* species and inhibits bacterial division.  
538 *Mol Microbiol* 111, 965-980.
- 539 Baldus, J.M., Green, B.D., Youngman, P., and Moran, C.P., Jr. (1994). Phosphorylation of *Bacillus*  
540 *subtilis* transcription factor Spo0A stimulates transcription from the spoIIG promoter by enhancing  
541 binding to weak 0A boxes. *J Bacteriol* 176, 296-306.
- 542 Bisson-Filho, A.W., Discola, K.F., Castellen, P., Blasios, V., Martins, A., Sforca, M.L., Garcia, W.,  
543 Zeri, A.C., Erickson, H.P., Dessen, A., *et al.* (2015). FtsZ filament capping by MciZ, a  
544 developmental regulator of bacterial division. *Proc Natl Acad Sci U S A* 112, E2130-2138.
- 545 Bobay, L.M., Touchon, M., and Rocha, E.P. (2014). Pervasive domestication of defective prophages  
546 by bacteria. *Proc Natl Acad Sci U S A* 111, 12127-12132.
- 547 Bonilla, C.Y., and Grossman, A.D. (2012). The primosomal protein DnaD inhibits cooperative DNA  
548 binding by the replication initiator DnaA in *Bacillus subtilis*. *J Bacteriol* 194, 5110-5117.
- 549 Bradshaw, N., Levdikov, V.M., Zimanyi, C.M., Gaudet, R., Wilkinson, A.J., and Losick, R. (2017).  
550 A widespread family of serine/threonine protein phosphatases shares a common regulatory switch  
551 with proteasomal proteases. *Elife* 6.
- 552 Burkholder, W.F., Kurtser, I., and Grossman, A.D. (2001). Replication initiation proteins regulate a  
553 developmental checkpoint in *Bacillus subtilis*. *Cell* 104, 269-279.
- 554 Casjens, S. (2003). Prophages and bacterial genomics: what have we learned so far? *Mol Microbiol*  
555 49, 277-300.
- 556 Chabes, A., Domkin, V., and Thelander, L. (1999). Yeast Sml1, a protein inhibitor of ribonucleotide  
557 reductase. *J Biol Chem* 274, 36679-36683.
- 558 Chu, Q., Ma, J., and Saghatelian, A. (2015). Identification and characterization of sORF-encoded  
559 polypeptides. *Crit Rev Biochem Mol Biol* 50, 134-141.
- 560 Couso, J.P., and Patraquim, P. (2017). Classification and function of small open reading frames.  
561 *Nature reviews Molecular cell biology* 18, 575-589.
- 562 Cunningham, K.A., and Burkholder, W.F. (2009). The histidine kinase inhibitor Sda binds near the  
563 site of autophosphorylation and may sterically hinder autophosphorylation and phosphotransfer to  
564 Spo0F. *Mol Microbiol* 71, 659-677.
- 565 Dolde, U., Rodrigues, V., Straub, D., Bhati, K.K., Choi, S., Yang, S.W., and Wenkel, S. (2018).  
566 Synthetic MicroProteins: Versatile Tools for Posttranslational Regulation of Target Proteins. *Plant*  
567 *physiology* 176, 3136-3145.
- 568 Dubnau, E.J., Carabetta, V.J., Tanner, A.W., Miras, M., Diethmaier, C., and Dubnau, D. (2016). A  
569 protein complex supports the production of Spo0A-P and plays additional roles for biofilms and the  
570 K-state in *Bacillus subtilis*. *Mol Microbiol* 101, 606-624.
- 571 Durfee, T., Nelson, R., Baldwin, S., Plunkett, G., Burland, V., Mau, B., Petrosino, J.F., Qin, X.,  
572 Muzny, D.M., Ayele, M., *et al.* (2008). The complete genome sequence of *Escherichia coli* DH10B:  
573 Insights into the biology of a laboratory workhorse. *Journal of Bacteriology* 190, 2597-2606.

- 574 Duval, M., and Cossart, P. (2017). Small bacterial and phagic proteins: an updated view on a rapidly  
575 moving field. *Current opinion in microbiology* *39*, 81-88.
- 576 Ebmeier, S.E., Tan, I.S., Clapham, K.R., and Ramamurthi, K.S. (2012). Small proteins link coat and  
577 cortex assembly during sporulation in *Bacillus subtilis*. *Mol Microbiol* *84*, 682-696.
- 578 Erpf, P.E., and Fraser, J.A. (2018). The Long History of the Diverse Roles of Short ORFs: sPEPs in  
579 Fungi. *Proteomics* *18*, e1700219.
- 580 Errington, J., and Wu, L.J. (2017). Cell Cycle Machinery in *Bacillus subtilis*. *Sub-cellular*  
581 *biochemistry* *84*, 67-101.
- 582 Felicori, L., Jameson, K.H., Roblin, P., Fogg, M.J., Garcia-Garcia, T., Ventroux, M., Cherrier, M.V.,  
583 Bazin, A., Noirot, P., Wilkinson, A.J., *et al.* (2016a). Tetramerization and interdomain flexibility of  
584 the replication initiation controller YabA enables simultaneous binding to multiple partners. *Nucleic*  
585 *Acids Res* *44*, 449-463.
- 586 Felicori, L., L., Jameson, K., Roblin, P., Fogg, M., M., Garcia-Garcia, T., Ventroux, M., Cherrier,  
587 M.V., Bazin, A., Noirot, P., Wilkinson, A., *et al.* (2016b). Tetramerization and interdomain  
588 flexibility of the replication initiation controller YabA enables simultaneous binding to multiple  
589 partners. *44*, 449-463.
- 590 Friedman, R.C., Kalkhof, S., Doppelt-Azeroual, O., Mueller, S.A., Chovancova, M., von Bergen, M.,  
591 and Schwikowski, B. (2017). Common and phylogenetically widespread coding for peptides by  
592 bacterial small RNAs. *BMC genomics* *18*, 553.
- 593 Fujikawa, N., Kurumizaka, H., Nureki, O., Terada, T., Shirouzu, M., Katayama, T., and Yokoyama,  
594 S. (2003). Structural basis of replication origin recognition by the DnaA protein. *Nucleic Acids Res*  
595 *31*, 2077-2086.
- 596 Fujita, M., Gonzalez-Pastor, J.E., and Losick, R. (2005). High- and low-threshold genes in the Spo0A  
597 regulon of *Bacillus subtilis*. *J Bacteriol* *187*, 1357-1368.
- 598 Goranov, A.I., Katz, L., Breier, A.M., Burge, C.B., and Grossman, A.D. (2005). A transcriptional  
599 response to replication status mediated by the conserved bacterial replication protein DnaA. *Proc*  
600 *Natl Acad Sci U S A* *102*, 12932-12937.
- 601 Graeff, M., and Wenkel, S. (2012). Regulation of protein function by interfering protein species.  
602 *Biomolecular concepts* *3*, 71-78.
- 603 Ha, U.H., Kim, J., Badrane, H., Jia, J., Baker, H.V., Wu, D., and Jin, S. (2004). An in vivo inducible  
604 gene of *Pseudomonas aeruginosa* encodes an anti-ExsA to suppress the type III secretion system.  
605 *Mol Microbiol* *54*, 307-320.
- 606 Handler, A.A., Lim, J.E., and Losick, R. (2008). Peptide inhibitor of cytokinesis during sporulation  
607 in *Bacillus subtilis*. *Mol Microbiol* *68*, 588-599.
- 608 He, C., Jia, C., Zhang, Y., and Xu, P. (2018). Enrichment-Based Proteogenomics Identifies  
609 Microproteins, Missing Proteins, and Novel smORFs in *Saccharomyces cerevisiae*. *J Proteome Res*  
610 *17*, 2335-2344.
- 611 Hellens, R.P., Brown, C.M., Chisnall, M.A.W., Waterhouse, P.M., and Macknight, R.C. (2016). The  
612 Emerging World of Small ORFs. *Trends in plant science* *21*, 317-328.
- 613 Hood, I.V., and Berger, J.M. (2016). Viral hijacking of a replicative helicase loader and its  
614 implications for helicase loading control and phage replication. *Elife* *5*.



- 615 Hoover, S.E., Xu, W., Xiao, W., and Burkholder, W.F. (2010). Changes in DnaA-dependent gene  
616 expression contribute to the transcriptional and developmental response of *Bacillus subtilis* to  
617 manganese limitation in Luria-Bertani medium. *J Bacteriol* *192*, 3915-3924.
- 618 Hwang, D.S., and Kornberg, A. (1992). Opening of the replication origin of *Escherichia coli* by  
619 DnaA protein with protein HU or IHF. *J Biol Chem* *267*, 23083-23086.
- 620 James, P., Halladay, J., and Craig, E.A. (1996). Genomic libraries and a host strain designed for  
621 highly efficient two-hybrid selection in yeast. *Genetics* *144*, 1425-1436.
- 622 Jameson, K.H., Rostami, N., Fogg, M.J., Turkenburg, J.P., Grahl, A., Murray, H., and Wilkinson,  
623 A.J. (2014). Structure and interactions of the *Bacillus subtilis* sporulation inhibitor of DNA  
624 replication, SirA, with domain I of DnaA. *Mol Microbiol* *93*, 975-991.
- 625 Jameson, K.H., and Wilkinson, A.J. (2017). Control of Initiation of DNA Replication in *Bacillus*  
626 *subtilis* and *Escherichia coli*. *Genes* *8*.
- 627 Jumper, J., Evans, R., Pritzel, A., Green, T., Figurnov, M., Ronneberger, O., Tunyasuvunakool, K.,  
628 Bates, R., Zidek, A., Potapenko, A., *et al.* (2021). Highly accurate protein structure prediction with  
629 AlphaFold. *Nature* *596*, 583-589.
- 630 Kastenmayer, J.P., Ni, L., Chu, A., Kitchen, L.E., Au, W.C., Yang, H., Carter, C.D., Wheeler, D.,  
631 Davis, R.W., Boeke, J.D., *et al.* (2006). Functional genomics of genes with small open reading  
632 frames (sORFs) in *S. cerevisiae*. *Genome research* *16*, 365-373.
- 633 Katayama, T., Kasho, K., and Kawakami, H. (2017). The DnaA Cycle in *Escherichia coli*:  
634 Activation, Function and Inactivation of the Initiator Protein. *Front Microbiol* *8*, 2496.
- 635 Katayama, T., Ozaki, S., Keyamura, K., and Fujimitsu, K. (2010). Regulation of the replication  
636 cycle: conserved and diverse regulatory systems for DnaA and oriC. *Nat Rev Microbiol* *8*, 163-170.
- 637 Kimura, T., Amaya, Y., Kobayashi, K., Ogasawara, N., and Sato, T. (2010). Repression of sigK  
638 intervening (skin) element gene expression by the CI-like protein SknR and effect of SknR depletion  
639 on growth of *Bacillus subtilis* cells. *J Bacteriol* *192*, 6209-6216.
- 640 Kunkel, B., Losick, R., and Stragier, P. (1990). The *Bacillus subtilis* gene for the development  
641 transcription factor sigma K is generated by excision of a dispensable DNA element containing a  
642 sporulation recombinase gene. *Genes & development* *4*, 525-535.
- 643 Lee, Y.D., Wang, J., Stubbe, J., and Elledge, S.J. (2008). Dif1 is a DNA-damage-regulated facilitator  
644 of nuclear import for ribonucleotide reductase. *Molecular cell* *32*, 70-80.
- 645 Leonard, A.C., and Grimwade, J.E. (2011). Regulation of DnaA assembly and activity: taking  
646 directions from the genome. *Annual review of microbiology* *65*, 19-35.
- 647 Liu, B., Shadrin, A., Sheppard, C., Mekler, V., Xu, Y., Severinov, K., Matthews, S., and  
648 Wigneshweraraj, S. (2014a). A bacteriophage transcription regulator inhibits bacterial transcription  
649 initiation by sigma-factor displacement. *Nucleic Acids Res* *42*, 4294-4305.
- 650 Liu, B., Shadrin, A., Sheppard, C., Mekler, V., Xu, Y., Severinov, K., Matthews, S., and  
651 Wigneshweraraj, S. (2014b). The sabotage of the bacterial transcription machinery by a small  
652 bacteriophage protein. *Bacteriophage* *4*, e28520.
- 653 Liu, J., Dehbi, M., Moeck, G., Arhin, F., Bauda, P., Bergeron, D., Callejo, M., Ferretti, V., Ha, N.,  
654 Kwan, T., *et al.* (2004). Antimicrobial drug discovery through bacteriophage genomics. *Nature*  
655 *biotechnology* *22*, 185-191.

- 656 Lloyd, C.R., Park, S., Fei, J., and Vanderpool, C.K. (2017). The Small Protein SgrT Controls  
657 Transport Activity of the Glucose-Specific Phosphotransferase System. *J Bacteriol* *199*.
- 658 Makarewich, C.A., and Olson, E.N. (2017). Mining for Micropeptides. *Trends Cell Biol* *27*, 685-696.
- 659 Marchadier, E., Carballido-Lopez, R., Brinster, S., Fabret, C., Mervelet, P., Bessieres, P., Noiro-  
660 Gros, M.F., Fromion, V., and Noiro, P. (2011). An expanded protein-protein interaction network in  
661 *Bacillus subtilis* reveals a group of hubs: Exploration by an integrative approach. *Proteomics* *11*,  
662 2981-2991.
- 663 Martin, E., Williams, H.E.L., Pitoulias, M., Stevens, D., Winterhalter, C., Craggs, T.D., Murray, H.,  
664 Searle, M.S., and Soultanas, P. (2019). DNA replication initiation in *Bacillus subtilis*: structural and  
665 functional characterization of the essential DnaA-DnaD interaction. *Nucleic Acids Res* *47*, 2101-  
666 2112.
- 667 Merrikh, H., and Grossman, A.D. (2011). Control of the replication initiator DnaA by an anti-  
668 cooperativity factor. *Mol Microbiol* *82*, 434-446.
- 669 Messer, W. (2002). The bacterial replication initiator DnaA. DnaA and oriC, the bacterial mode to  
670 initiate DNA replication. *FEMS microbiology reviews* *26*, 355-374.
- 671 Messer, W., and Weigel, C. (2003). DnaA as a transcription regulator. *Methods in enzymology* *370*,  
672 338-349.
- 673 Miravet-Verde, S., Ferrar, T., Espadas-Garcia, G., Mazzolini, R., Gharrab, A., Sabido, E., Serrano,  
674 L., and Lluch-Senar, M. (2019). Unraveling the hidden universe of small proteins in bacterial  
675 genomes. *Molecular systems biology* *15*, e8290.
- 676 Mirouze, N., Prepiak, P., and Dubnau, D. (2011). Fluctuations in spo0A transcription control rare  
677 developmental transitions in *Bacillus subtilis*. *PLoS Genet* *7*, e1002048.
- 678 Moeller, R., Setlow, P., Horneck, G., Berger, T., Reitz, G., Rettberg, P., Doherty, A.J., Okayasu, R.,  
679 and Nicholson, W.L. (2008). Roles of the major, small, acid-soluble spore proteins and spore-specific  
680 and universal DNA repair mechanisms in resistance of *Bacillus subtilis* spores to ionizing radiation  
681 from X rays and high-energy charged-particle bombardment. *J Bacteriol* *190*, 1134-1140.
- 682 Molle, V., Fujita, M., Jensen, S.T., Eichenberger, P., Gonzalez-Pastor, J.E., Liu, J.S., and Losick, R.  
683 (2003). The Spo0A regulon of *Bacillus subtilis*. *Mol Microbiol* *50*, 1683-1701.
- 684 Mott, M.L., and Berger, J.M. (2007). DNA replication initiation: mechanisms and regulation in  
685 bacteria. *Nat Rev Microbiol* *5*, 343-354.
- 686 Murray, H., and Errington, J. (2008). Dynamic control of the DNA replication initiation protein  
687 DnaA by Soj/ParA. *Cell* *135*, 74-84.
- 688 Murray, H., and Koh, A. (2014). Multiple regulatory systems coordinate DNA replication with cell  
689 growth in *Bacillus subtilis*. *PLoS Genet* *10*, e1004731.
- 690 Natrajan, G., Noiro-Gros, M.F., Zawilak-Pawlik, A., Kapp, U., and Terradot, L. (2009). The  
691 structure of a DnaA/HobA complex from *Helicobacter pylori* provides insight into regulation of  
692 DNA replication in bacteria. *Proc Natl Acad Sci U S A* *106*, 21115-21120.
- 693 Nechaev, S., Imburgio, D., and Severinov, K. (2003). Purification and characterization of  
694 bacteriophage-encoded inhibitors of host RNA polymerase: T-odd phage gp2-like proteins. *Methods*  
695 *in enzymology* *370*, 212-225.

- 696 Nicolas, P., Mader, U., Dervyn, E., Rochat, T., Leduc, A., Pigeonneau, N., Bidnenko, E., Marchadier,  
697 E., Hoebeke, M., Aymerich, S., *et al.* (2012). Condition-dependent transcriptome reveals high-level  
698 regulatory architecture in *Bacillus subtilis*. *Science* 335, 1103-1106.
- 699 Noiroot-Gros, M.F., Dervyn, E., Wu, L.J., Mervelet, P., Errington, J., Ehrlich, S.D., and Noiroot, P.  
700 (2002). An expanded view of bacterial DNA replication. *Proc Natl Acad Sci U S A* 99, 8342-8347.
- 701 Noiroot-Gros, M.F., Velten, M., Yoshimura, M., McGovern, S., Morimoto, T., Ehrlich, S.D.,  
702 Ogasawara, N., Polard, P., and Noiroot, P. (2006). Functional dissection of YabA, a negative regulator  
703 of DNA replication initiation in *Bacillus subtilis*. *Proc Natl Acad Sci U S A* 103, 2368-2373.
- 704 Ozaki, S., and Katayama, T. (2009). DnaA structure, function, and dynamics in the initiation at the  
705 chromosomal origin. *Plasmid* 62, 71-82.
- 706 Quevillon-Cheruel, S., Campo, N., Mirouze, N., Mortier-Barriere, I., Brooks, M.A., Boudes, M.,  
707 Durand, D., Soulet, A.L., Lisboa, J., Noiroot, P., *et al.* (2012). Structure-function analysis of  
708 pneumococcal DprA protein reveals that dimerization is crucial for loading RecA recombinase onto  
709 DNA during transformation. *Proc Natl Acad Sci U S A* 109, E2466-2475.
- 710 Riber, L., Frimodt-Moller, J., Charbon, G., and Lobner-Olesen, A. (2016). Multiple DNA Binding  
711 Proteins Contribute to Timing of Chromosome Replication in *E. coli*. *Frontiers in molecular*  
712 *biosciences* 3, 29.
- 713 Rowland, S.L., Burkholder, W.F., Cunningham, K.A., Maciejewski, M.W., Grossman, A.D., and  
714 King, G.F. (2004). Structure and mechanism of action of Sda, an inhibitor of the histidine kinases  
715 that regulate initiation of sporulation in *Bacillus subtilis*. *Molecular cell* 13, 689-701.
- 716 Saghatelian, A., and Couso, J.P. (2015). Discovery and characterization of smORF-encoded bioactive  
717 polypeptides. *Nat Chem Biol* 11, 909-916.
- 718 Samayoa, J., Yildiz, F.H., and Karplus, K. (2011). Identification of prokaryotic small proteins using a  
719 comparative genomic approach. *Bioinformatics* 27, 1765-1771.
- 720 Savalia, D., Robins, W., Nechaev, S., Molineux, I., and Severinov, K. (2010). The role of the T7 Gp2  
721 inhibitor of host RNA polymerase in phage development. *Journal of molecular biology* 402, 118-126.
- 722 Schmalisch, M., Maiques, E., Nikolov, L., Camp, A.H., Chevreux, B., Muffler, A., Rodriguez, S.,  
723 Perkins, J., and Losick, R. (2010). Small genes under sporulation control in the *Bacillus subtilis*  
724 genome. *J Bacteriol* 192, 5402-5412.
- 725 Scholefield, G., and Murray, H. (2013). YabA and DnaD inhibit helix assembly of the DNA  
726 replication initiation protein DnaA. *Mol Microbiol* 90, 147-159.
- 727 Scholefield, G., Veening, J.W., and Murray, H. (2011). DnaA and ORC: more than DNA replication  
728 initiators. *Trends Cell Biol* 21, 188-194.
- 729 Setlow, P. (2007). I will survive: DNA protection in bacterial spores. *Trends in microbiology* 15,  
730 172-180.
- 731 Skarstad, K., and Katayama, T. (2013). Regulating DNA replication in bacteria. *Cold Spring Harbor*  
732 *perspectives in biology* 5, a012922.
- 733 Slavoff, S.A., Heo, J., Budnik, B.A., Hanakahi, L.A., and Saghatelian, A. (2014). A human short  
734 open reading frame (sORF)-encoded polypeptide that stimulates DNA end joining. *J Biol Chem* 289,  
735 10950-10957.

- 736 Slavoff, S.A., Mitchell, A.J., Schwaid, A.G., Cabili, M.N., Ma, J., Levin, J.Z., Karger, A.D., Budnik,  
737 B.A., Rinn, J.L., and Saghatelian, A. (2013). Peptidomic discovery of short open reading frame-  
738 encoded peptides in human cells. *Nat Chem Biol* 9, 59-64.
- 739 Soufo, C.D., Soufo, H.J., Noirot-Gros, M.F., Steindorf, A., Noirot, P., and Graumann, P.L. (2008).  
740 Cell-cycle-dependent spatial sequestration of the DnaA replication initiator protein in *Bacillus*  
741 *subtilis*. *Dev Cell* 15, 935-941.
- 742 Staudt, A.C., and Wenkel, S. (2011). Regulation of protein function by 'microProteins'. *EMBO*  
743 *reports* 12, 35-42.
- 744 Sterlini, J.M., and Mandelstam, J. (1969). Commitment to sporulation in *Bacillus subtilis* and its  
745 relationship to development of actinomycin resistance. *The Biochemical journal* 113, 29-37.
- 746 Storz, G., Wolf, Y.I., and Ramamurthi, K.S. (2014). Small proteins can no longer be ignored. *Annu*  
747 *Rev Biochem* 83, 753-777.
- 748 Stragier, P., Bonamy, C., and Karmazyn-Campelli, C. (1988). Processing of a sporulation sigma  
749 factor in *Bacillus subtilis*: how morphological structure could control gene expression. *Cell* 52, 697-  
750 704.
- 751 Straub, D., and Wenkel, S. (2017). Cross-Species Genome-Wide Identification of Evolutionary  
752 Conserved MicroProteins. *Genome biology and evolution* 9, 777-789.
- 753 VanOrsdel, C.E., Kelly, J.P., Burke, B.N., Lein, C.D., Oufiero, C.E., Sanchez, J.F., Wimmers, L.E.,  
754 Hearn, D.J., Abuikhdair, F.J., Barnhart, K.R., *et al.* (2018). Identifying New Small Proteins in  
755 *Escherichia coli*. *Proteomics* 18, e1700064.
- 756 Veening, J.W., Murray, H., and Errington, J. (2009). A mechanism for cell cycle regulation of  
757 sporulation initiation in *Bacillus subtilis*. *Genes & development* 23, 1959-1970.
- 758 Washington, T.A., Smith, J.L., and Grossman, A.D. (2017). Genetic networks controlled by the  
759 bacterial replication initiator and transcription factor DnaA in *Bacillus subtilis*. *Mol Microbiol* 106,  
760 109-128.
- 761 Weir, M., and Keeney, J.B. (2014). PCR mutagenesis and gap repair in yeast. *Methods in molecular*  
762 *biology* 1205, 29-35.
- 763 Wu, L.J., and Errington, J. (2011). Nucleoid occlusion and bacterial cell division. *Nat Rev Microbiol*  
764 10, 8-12.
- 765 Wu, W., and Jin, S. (2005). PtrB of *Pseudomonas aeruginosa* suppresses the type III secretion system  
766 under the stress of DNA damage. *J Bacteriol* 187, 6058-6068.
- 767 Yang, X., Jensen, S.I., Wulff, T., Harrison, S.J., and Long, K.S. (2016). Identification and validation  
768 of novel small proteins in *Pseudomonas putida*. *Environmental microbiology reports* 8, 966-974.
- 769 Zanet, J., Benrabah, E., Li, T., Pelissier-Monier, A., Chanut-Delalande, H., Ronsin, B., Bellen, H.J.,  
770 Payre, F., and Plaza, S. (2015). Pri sORF peptides induce selective proteasome-mediated protein  
771 processing. *Science* 349, 1356-1358.
- 772 Zuber, P. (2001). A peptide profile of the *Bacillus subtilis* genome. *Peptides* 22, 1555-1577.

773

## 774 **10 Legends to figures**

775 **Figure 1:**

776 **A) SknR transcriptionally represses the *yqaF-yqaN* operon of the Skin element. B-C) Yeast two-**  
777 **hybrid interaction assay.** Haploid yeast strains expressing *yqaH*, *dnaA* and *yabA* infusion with the  
778 BD and AD domains of gal4 are separately introduced into haploid yeast strains. Binary interactions  
779 are tested by the ability of diploids to grow onto selective media. **D) DnaA interaction with YqaH**  
780 **and regulators.** Numbers refer to amino acid boundaries (see also Figure S1). Schematic  
781 representation of the architecture of the four functional domains of DnaA with associated functions as  
782 illustrated by colors. The binding of negative regulators to their targeted DnaA functional domain is  
783 illustrated accordingly. The YqaH interacting domains of DnaA with associated yeast 2HB  
784 interacting phenotypes (IP) are indicated. (+) and (-) refers growth or absence of growth on selective  
785 media, reflecting interacting or loss of interaction phenotype, respectively.

786

787 **Figure 2:**

788 ***YqaH* triggers *dnaA*-related phenotypes. A) Effect of *yqaH* expression on growth.** Cells carrying  
789 plasmids pDG148 (control, plain lines) or pDG148-*yqaH* (dashed lines) were examined in the  
790 presence of IPTG (0.5 mM) over 5 hours. Growth was monitored either by OD<sub>600</sub> (black) or by cells  
791 viability, measured as the number of colony forming units per ml, normalized by OD<sub>600</sub> (red). **B)**  
792 **Nucleoid morphological defects.** Samples of living cells were examined by bright field (up) and  
793 fluorescent microscopy (down) after staining with of FM4-64 (membrane dye false-colored in red)  
794 and DAPI (DNA dye, false-colored in blue). White and yellow arrows indicate guillotined  
795 chromosomes resulting from septal closing over nucleoids and aberrant nucleoid segregation  
796 patterns, respectively and typical example of chromosomal segregation defects is magnified. Scale  
797 bars are 5 μm. **C) YqaH affects *dnaA* expression.** Cells harboring either the pDG148 or pDG148-  
798 *yqaH* were grown in LB in the presence of IPTG. RNAs from exponentially grown cells (OD<sub>600</sub>~0.3)  
799 were extracted and expression levels of *dnaA* were monitored by qPCR in the presence (+) or  
800 absence (-) of YqaH.

801

802 **Figure 3:**

803 **YqaH triggers sporulation and Spo0A-related phenotypes. A-B) YqaH expression inhibits**  
804 **sporulation.** Cells carrying plasmids pDG148 (control) or pDG148-*yqaH* were grown in Sterlini-  
805 Mandeltam medium in the presence of IPTG (0.5 mM) added at the onset ( $t_0$ ) of sporulation.  
806 Sporulant cells were observed at different time after initiation of sporulation. **A)** Snapshot captures  
807 of light and fluorescence microscopy at indicated  $t_{hrs}$  time. Cells were stained with fluorescent  
808 membrane dye FM4-64 (left panel). **B)** Sporulating cells were quantified by monitoring asymmetric  
809 septa, engulfed forespore and free spores, in the presence (+) or absence (-) of YqaH. Ratios were  
810 determined from observation of > 500 cells over 2 independent experiments and 3 biological  
811 replicates per experiment. **C) YqaH affects expression of Spo0A-regulated genes.** Expression  
812 levels of *spoIIE* and *spoIIGA* genes from the Spo0A regulon were monitored by real-time qPCR in

813 the presence (+) or absence (-) of YqaH and expressed as relative expression ratio compared to  
814 control (-) (n≥6).  
815

816 **Figure 4:**

817 **Restoration of replication initiation defects by YqaH\_DnaA LOI mutation.** Exponentially  
818 growing *B. subtilis* cells carrying either pDG148 (-), pDG148-*yqaH* (WT), pDG148-*yqaH* LOI  
819 mutant derivatives K17E or R56W were grown in the presence of IPTG and harvested at similar  
820 OD600~0.3 and assessed for various *dnaA*-related phenotypes: **A) Nucleoid morphological**  
821 **phenotypes.** Cells were treated with DAPI to reveal nucleoids (false-colored blue) and with the  
822 membrane dye FM4-64 (false colored red). White and yellow arrows indicate septum-entrapped  
823 nucleoids and aberrant condensation and segregation, respectively. Scale bars are 5µm. **B-C-D)**  
824 **Analysis of DnaA-dependent replication initiation phenotypes.** **B)** Ori/ter ratio; Origin-proximal  
825 and Terminus proximal DNA sequences were quantified by qPCR. **C)** Visualization of origins foci in  
826 living cells. Origins are tagged through binding of the GFP-LacI repressor to LacO operator  
827 sequences inserted at proximal location from *oriC*. **D)** Averaged number of replication origins per  
828 cell determined as the number of GFP-LacI foci upon induced condition in control (-), WT and  
829 K17E- mutant derivative of YqaH. Statistical significance are illustrated by stars (t-test; Ori/ter: n=6;  
830 *dnaA* mRNA: n=12; P< 0.05 \*; P<0.01 \*\*; P<0.001 \*\*\*).

831

832 **Figure 5:**

833 **Effect of YqaH LOI mutants on *dnaA* expression.** Cells harboring either the pDG148, pDG148-  
834 *yqaH*WT or K17E and R56W mutated derivatives were grown in LB in the presence of IPTG. RNAs  
835 from exponentially grown cells (OD600~0.3) were extracted and expression levels of the *dnaA* gene  
836 were monitored by qPCR in the absence (-) or in the presence of YqaH. (WT, K17E, R56W).

837

838 **Figure 6:**

839 **Effect of the YqaH\_K17E mutant on Spo0A activity:** Strains carrying a fusion of the *spoIIIG*  
840 promoter to the luciferase coding sequence (*luc*), and harboring either plasmid pDG148, pDG148-  
841 *yqaH* WT or K17E mutant derivative, were induced to sporulation in SM medium supplemented with  
842 0.5 mM IPTG. Luminescence was recorded in *B. subtilis* 168 (*sda*+) (**B**) and  $\Delta$ *sda* (**C**) strain  
843 backgrounds. **D)** Grouped-violin plot comparing the max levels of luciferase at 3 hours. **A, E)**  
844 Sporulation efficiency in *B. subtilis* 168 *sda*+ and  $\Delta$ *sda*. Sporulating cells were quantified by  
845 monitoring asymmetric septa, engulfed forespores 6 hours after sporulation initiation, in the absence  
846 (-) or in the presence of YqaH WT and K17E. Ratios were determined from observation of > 500  
847 cells over 2 independent experiments and 3 biological replicates per experiment. Pairwise  
848 comparisons were performed using the Holm-Bonferroni method (\*p <= 0.05 \*\*p <= 0.01  
849 \*\*\*p <= 0.001).

850

851 **Table 1:**

852 **YqaH\_LOI mutational screen.** Aminoacid substitution affecting interaction with DnaA and/or DnaN  
853 are indicated with their associated interaction phenotype. (-) refers as a total loss of interaction  
854 phnotype leading to absence of growth on both –LUH and –LUA media. (+/-) refers as a partial loss  
855 of interaction leading to some growth on the –LUH but not –LUA; see also Figure S1 for additional  
856 explanation.

857

858 **Figure 1**

859

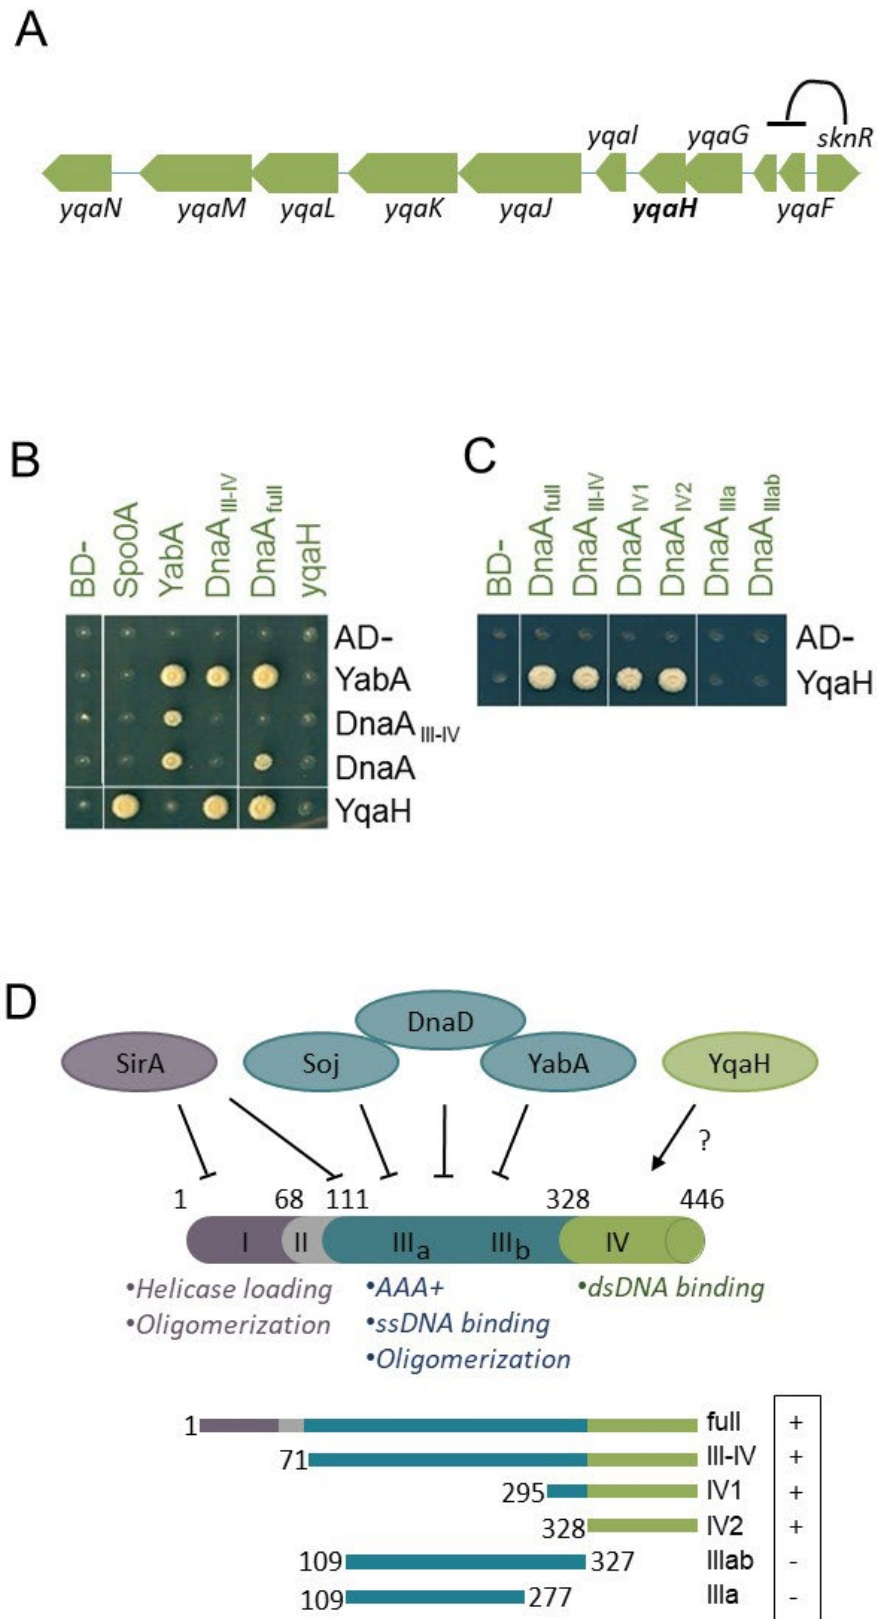



860 **Figure 2**

861

862

863

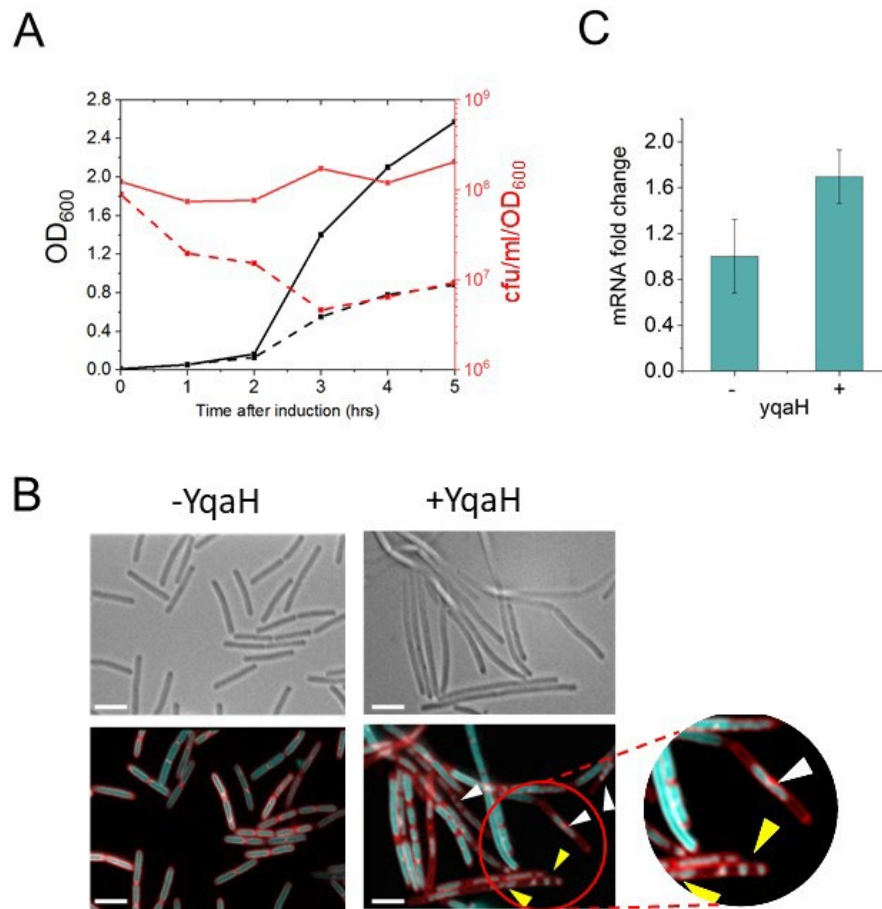

864 **Figure 3**

865

866

867

868

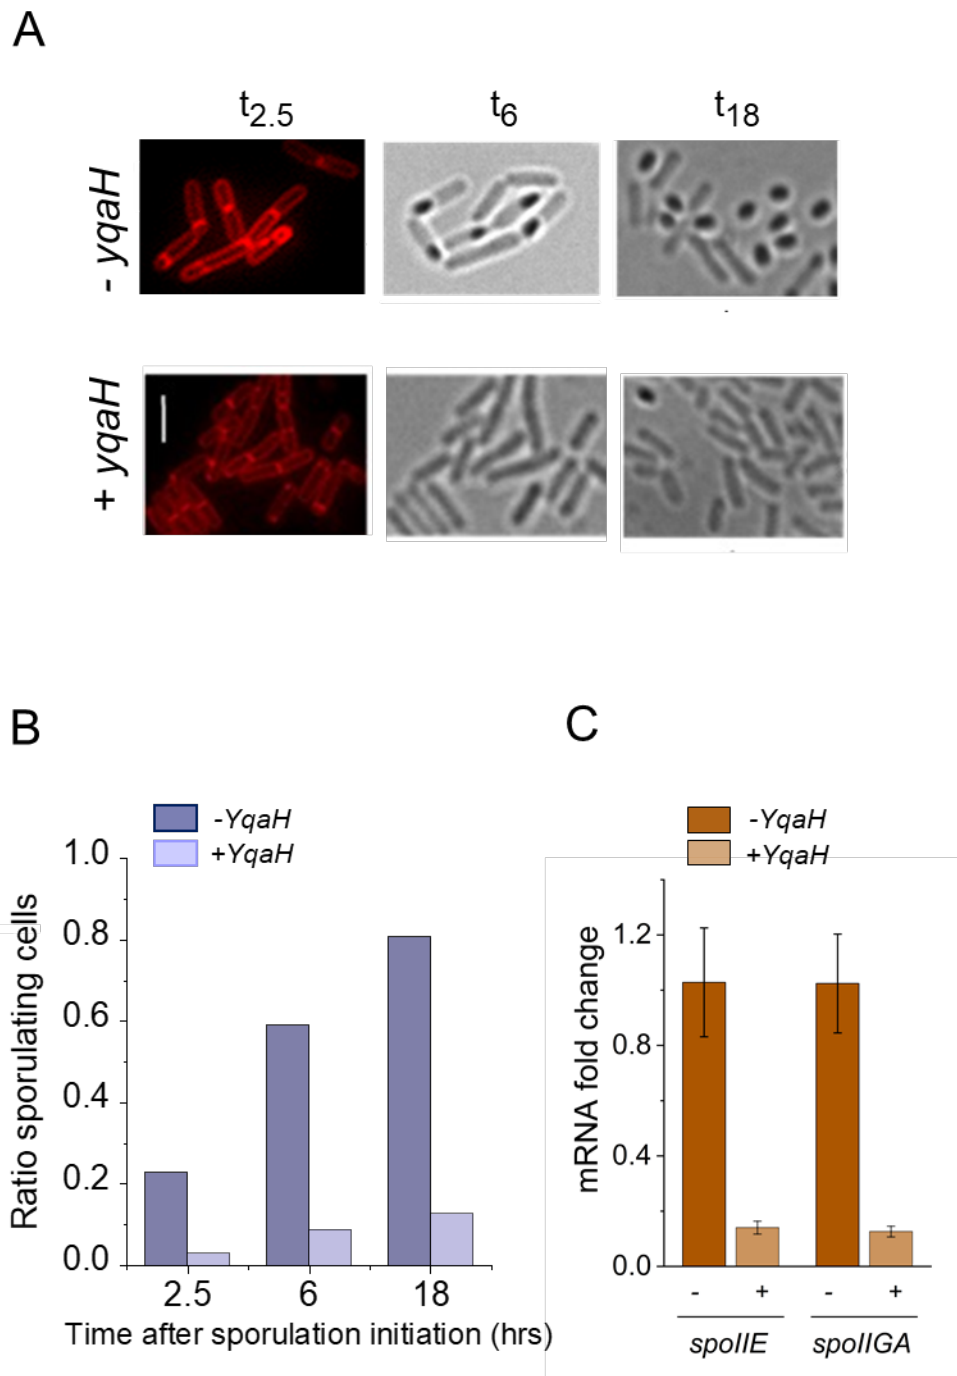

869 **Figure 4**

870

871

872

873

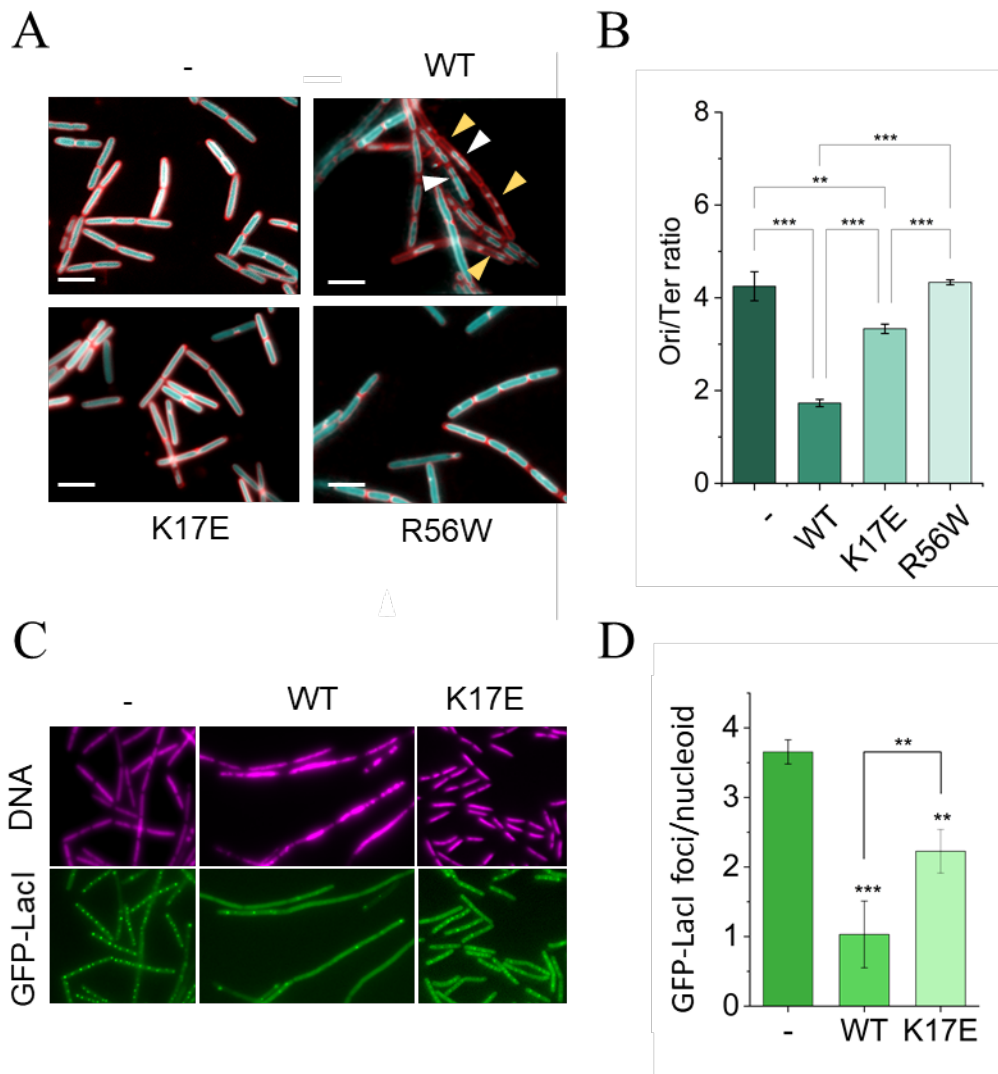

874 **Figure 5**

875

876

877

878

879

880

881

882

883

884

885

886

887

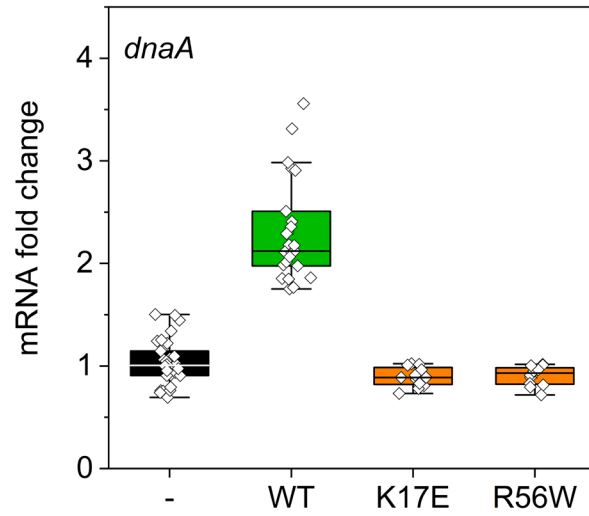

888 **Figure 6**

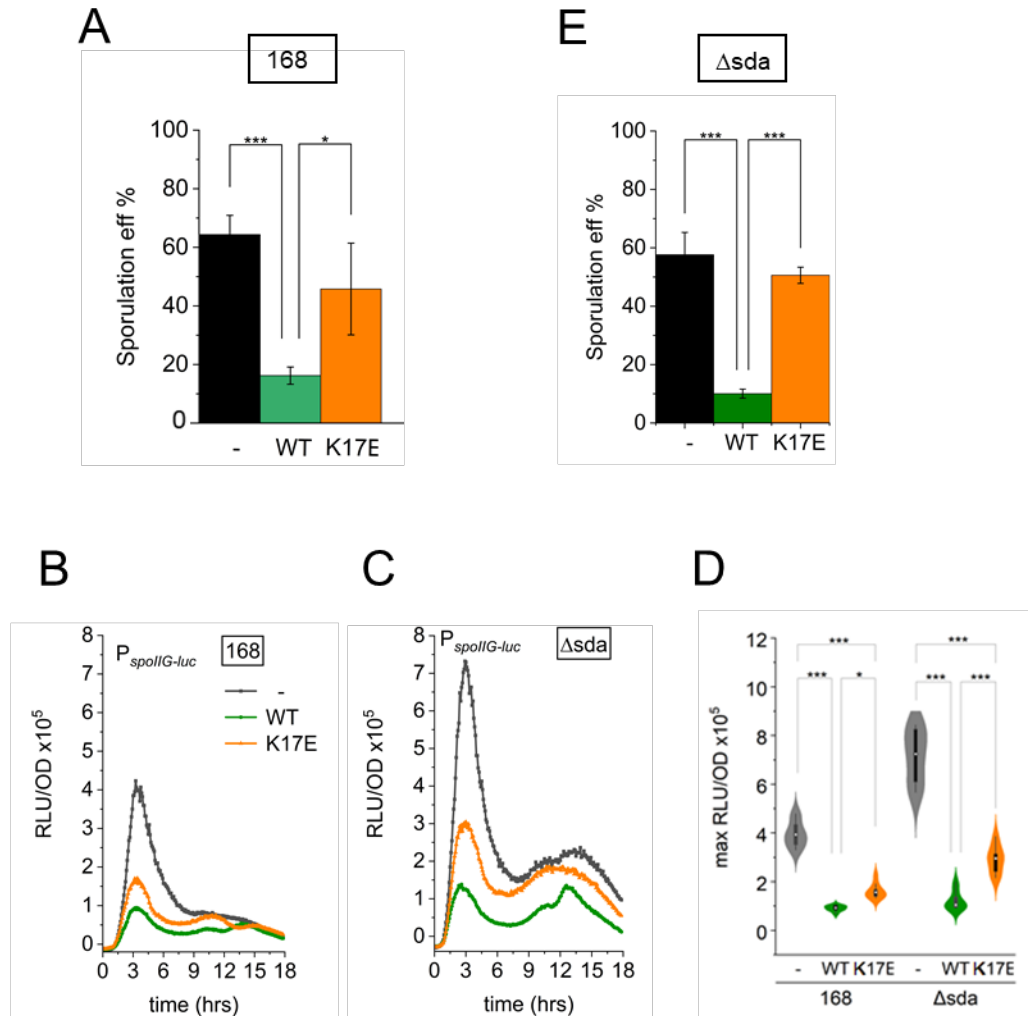

889 **Table 1**

890

|          |      | DnaA | Spo0A |
|----------|------|------|-------|
| YqaH_LOI | D10G | -    | -     |
|          | R16G | +/-  | +     |
|          | K17E | -    | +     |
|          | S20L | -    | -     |
|          | S25T | +/-  | +/-   |
|          | M27T | +/-  | +     |
|          | L28P | -    | -     |
|          | Y37H | +/-  | +     |
|          | E38K | -    | +     |
|          | E38V | +/-  | +     |
|          | A40T | +/-  | +/-   |
|          | L43P | -    | -     |
|          | A44V | +/-  | +     |
|          | K48E | -    | +     |
|          | R56W | +/-  | +     |
|          | L57P | -    | -     |

891

892

893

894

895
