# 1 **A bacterial prophage small peptide counteracts DnaA activities in *B.*** 2 ***subtilis*.**

3 **Magali Ventroux and Marie-Francoise Noirot-Gros\***

4 Université Paris-Saclay, INRAE, AgroParisTech, Micalis Institute, 78350, Jouy-en-Josas, France.

5 **\* Correspondence:**

6 marie-francoise.noirot-gros@inrae.fr

7 **Keywords:** small ORF, SEP, skin element, DnaA, Spo0A, *B. subtilis*

8

## 9 **Abstract**

10 Bacteriophages are able to hijack host essential machineries to benefit their fitness and assemble their  
11 own progeny. Phage proteins targeting major bacterial pathways can be powerful tools to understand  
12 cell functions and have possible applications in human health and industry. Bacterial genomes also  
13 harbor cryptic prophages carrying genes that may contribute to their host fitness and properties. The  
14 cryptic prophages are mostly transcriptionally silent and most of the functions they encode are not  
15 annotated. In *B. subtilis*, the 48 kb-long *skin* element is a prophage carrying the *yqaF-yqaN* operon,  
16 which is tightly regulated by the Xre-like repressor *sknR*. The small *yqaH* gene potentially encodes  
17 the protein *YqaH* in absence of *SknR*. It was previously reported that *YqaH* interacts with the  
18 replication initiator *DnaA* in yeast two-hybrid assay and its expression in *B. subtilis* causes defects in  
19 the chromosomal cycle. In this study, we report that, in addition to *DnaA*, *YqaH* interacts with  
20 *Spo0A*, a master regulator of sporulation. To decipher *yqaH* mode of action, we used the yeast two-  
21 hybrid to isolate single mutations in *yqaH* that separate interactions with *DnaA* and *Spo0A*. We  
22 isolated mutations that caused loss-of-interaction (LOI) with *DnaA* but not *Spo0A*. However, all  
23 mutations disrupting the interaction with *Spo0A* were also *DnaA*-LOI functions, suggesting that  
24 these functions could not be separated. We found that expression *YqaH* carrying *DnaA*-LOI  
25 mutations affects both chromosome integrity and *DnaA*-mediated transcription, leading to growth  
26 inhibition as well as preventing bacterial development such as sporulation and biofilm formation.  
27 These results show that *YqaH* acts as an antimicrobial peptide in *B. subtilis* and pave the way for the  
28 structural design of mutants with improved antibacterial action.

29

## 30 **1 Introduction**

31 Small proteins encoded by short open reading frames (smORFs) has emerged as a new class of  
32 micropeptides widespread in both in eukaryotic and prokaryotic genomes (Albuquerque et al., 2015;  
33 Couso and Patraquim, 2017; Hellens et al., 2016; Samayoa et al., 2011; Storz et al., 2014). Due to  
34 their small size, smORFs have been overlooked for a long time. However, with advanced  
35 computation and ribosome profiling-based biochemical methods, small proteins are being now more

36 widely identified and some has been functionally characterized (Chu et al., 2015; He et al., 2018;  
37 Samayoa et al., 2011; Straub and Wenkel, 2017; VanOrsdel et al., 2018). Growing evidence indicates  
38 they often encode bioactive peptides (Chu et al., 2015; Saghatelian and Couso, 2015). However, their  
39 contribution to cellular functions remains largely unexplored.

40 Micropeptides (for the smallest <30aa or microProteins up to 100 aa) were identified to act as  
41 regulators of diverse cellular processes in eukaryotes (Staudt and Wenkel, 2011). In plants,  
42 characterized micro-proteins were found to regulate transcription factors by sequestering them into  
43 nonfunctional states, preventing DNA binding or transcriptional activation (Dolde et al., 2018; Graeff  
44 and Wenkel, 2012). In *Drosophila melanogaster*, smORF-encoded peptides (SEPs) represent about  
45 5% of the transcriptome and play an important role in controlling drosophila development by  
46 triggering post-translational processing of transcriptional regulators (Albuquerque et al., 2015; Zanet  
47 et al., 2015). In human, SEPs has been discovered with specific subcellular localization, suggesting  
48 they can fulfill biological functions (Slavoff et al., 2013). As example, a 69 aa long SEP, MRI-2,  
49 has been described to play a role in stimulating DNA repair through binding to the DNA end-binding  
50 protein complex Ku (Slavoff et al., 2014). SEPs represent about 2% of the genome of *S. cerevisiae*  
51 (Erpf and Fraser, 2018). Their function remains largely elusive but few has been identified to play  
52 regulatory roles in diverse physiological processes such as iron homeostasis (An et al., 2015) or DNA  
53 synthetis (Chabes et al., 1999; Erpf and Fraser, 2018; Lee et al., 2008). Genomic analysis of the *S.*  
54 *cerevisiae* sORFs revealed that a significant part are conserved in other eukaryotes even as  
55 phylogenetically distantly related such as humans, thus emphasizing their biological significance  
56 (Kastenmayer et al., 2006).

57 In Prokaryotes, small proteins are encoded by 10 to 20% of sRNA in average, and are often species-  
58 specific (Friedman et al., 2017; Miravet-Verde et al., 2019; VanOrsdel et al., 2018; Yang et al., 2016;  
59 Zuber, 2001). SEPs with characterized functions were found involved in various cellular processes  
60 (Storz et al., 2014). In *P. aeruginosa*, PtrA (63-aa long) and PtrB (59-aa long) repress the type III  
61 secretion system in response to DNA stress (Ha et al., 2004; Wu and Jin, 2005). In *E. coli*, the 43-aa  
62 long peptide SrgT interferes with the PTS glucose transport system allowing cells to utilize  
63 alternative non-PTS carbon sources to rapidly adapt to environmental changes in nutrient availability  
64 (Lloyd et al., 2017). In *B. subtilis*, SEPs have been found to participate in regulating cell division and  
65 stress responses (Ebmeier et al., 2012; Handler et al., 2008; Schmalisch et al., 2010). A compelling  
66 example is the recently characterized developmental regulator MciZ (mother cell inhibitor of FtsZ), a  
67 40-aa long peptide which prevents cytokinesis in the mother cell during sporulation (Araujo-Bazan et  
68 al., 2019; Bisson-Filho et al., 2015). In this bacteria, about 20% of the total core protein of the mature  
69 spores is composed by the small acid-soluble spore proteins (SASPs) playing an important role in  
70 protecting DNA in the dormant spores (Moeller et al., 2008; Setlow, 2007). Notably, several  
71 smORFs identified in intergenic regions were reported to be expressed during sporulation  
72 (Schmalisch et al., 2010). The sporulation inhibitor *sda* encodes a 52aa long protein, which acts as a  
73 checkpoint system coordinating DNA replication with sporulation initiation (Burkholder et al., 2001;  
74 Cunningham and Burkholder, 2009; Rowland et al., 2004). Its mode of action has been extensively  
75 characterized at molecular level. Sda binds to the primary sporulation kinase KinA, preventing its  
76 activation and subsequent phosphorelay-mediated activation of the master sporulation regulator

77 Spo0A (Cunningham and Burkholder, 2009; Veening et al., 2009). By linking DNA replication to a  
78 phosphorylation-dependent signaling cascade that triggers cellular development, this system  
79 illustrates an important biological role played by a SEP in blocking sporulation in response to DNA  
80 stress in *bacillus* (Veening et al., 2009).

81 Small proteins encoded by phage or by prophage-like regions of bacterial genomes have been  
82 identified to hijack the host cellular machineries, as part of a strategy to shift host resources toward  
83 the production of viral progeny (Liu et al., 2014; Duval and Cossart, 2017). The bacteriophage T7  
84 gene 2 encodes the 64 aa-long gp2 protein essential for infection of *E. coli*. Studies of its biological  
85 role revealed that gp2 inhibits transcription by binding to RNA polymerase (RNAP), promoting a  
86 host-to-viral RNAP switch (Nechaev and Severinov, 2003; Savalia et al., 2010). Another illustration  
87 is the 52-aa long protein ORF104 of phage 77 infecting *S. aureus*. ORF104 is able to interfere with  
88 the host chromosome replication by binding to the ATPase domain of the helicase loader protein  
89 DnaI, thus preventing the loading of the DNA helicase DnaC (Liu et al., 2004; Hood and Berger,  
90 2016).

91 DNA replication is an essential process in all living organisms. Owing to their essentiality, proteins  
92 that compose the orisome and the replisome machineries are potential targets for the development of  
93 antimicrobials. In bacteria, DNA replication is initiated by the conserved initiator protein DnaA that  
94 assembles to the chromosomal replication origin to elicit local DNA strand opening (Hwang and  
95 Kornberg, 1992; Leonard and Grimwade, 2011; Mott and Berger, 2007; Ozaki and Katayama, 2009).  
96 This step triggers the coordinated assembly of the proteins that will further build a functional  
97 replication fork, from the DNA helicase, unwinding the DNA duplex, to the many components of the  
98 replisome that form the replication machinery (Messer, 2002). In addition to its initiator activity,  
99 DnaA acts as a transcription factor repressing or activating genes (Messer and Weigel, 2003). The  
100 activity of the initiator DnaA is tightly controlled to coordinate chromosomal replication initiation  
101 with other cellular processes during the bacterial cell cycle (Katayama et al., 2010; Scholefield and  
102 Murray, 2013). Part of this control is mediated by protein-protein interactions and involves various  
103 protein regulators that bind DnaA and affect his activity (Felicori et al., 2016; Jameson and  
104 Wilkinson, 2017; Katayama et al., 2017; Riber et al., 2016; Skarstad and Katayama, 2013). In *B.*  
105 *subtilis*, four proteins SirA, Soj, DnaD and YabA have been identified to regulate DnaA activity or  
106 its assembly at OriC through direct interaction (Bonilla and Grossman, 2012; Felicori et al., 2016;  
107 Martin et al., 2019; Murray and Errington, 2008).

108 Phage SEPs targeting important functions in bacteria are regarded as promising antimicrobial  
109 peptides, and ignited a strong interest in their identification and characterization (Hood and Berger,  
110 2016; Liu et al., 2004). The phage-like element skin of *B. subtilis* encodes about 60 proteins. The  
111 skin element is repressed under most physiological conditions (Nicolas et al., 2012), silenced by the  
112 skin repressor SknR (Figure 1A) (Kimura et al., 2010). Excision of skin from the genome restore  
113 the integrity of sigK gene encoding the late sporulation  $\sigma$ K factor (Kunkel et al., 1990). Among the  
114 skin ORFs, *yqaH* encodes the 85 aa-long polypeptide YqaH that has been previously identified to  
115 bind to the replication initiator protein DnaA in a yeast two-hybrid genomic screen (Noirot-Gros et  
116 al., 2002; Marchadier et al., 2011). When *yqaH* is overexpressed, bacillus cells exhibits aberrant

117 nucleoid morphological defects suggestive of replication deficiency (Kimura et al., 2010). In this  
118 study, we further characterized the function of *yqaH* in antagonizing DnaA. In addition, we found  
119 that YqaH also interacts with the master regulator Spo0A involved in developmental transitions to  
120 sporulation and biofilm formation (Dubnau et al., 2016). As DnaA, Spo0A is a DNA-binding protein,  
121 which, under its activated phosphorylated form (Spo0A-P) controls the expression of numerous  
122 genes during the early stages of sporulation (Molle et al., 2003). To further understand the biological  
123 role of this sORF in *B. subtilis* we performed the functional dissection of YqaH. Using a reverse  
124 yeast two-hybrid system, we selected *yqaH* alleles that selectively disrupted the YqaH/DnaA  
125 complex. This approach allowed us to link specific DnaA loss-of-interaction with loss-of-function  
126 phenotypes

127

## 128 **2 Material and Methods**

### 129 **2.1 Strains, plasmids and primers**

130 Experiments were performed in strains 168 *trp*<sup>+</sup> or TF8A a phage-cured strain lacking the prophage-  
131 like element ‘skin’ element as well as the prophages SP $\beta$  and PBSX (Nicolas et al., 2012; Westers et  
132 al., 2003) (Table S1A). *Saccharomyces cerevisiae* PJ69-4a or  $\alpha$  strains used for yeast-two-hybrid  
133 experiments (James et al., 1996). *Escherichia coli* strain DH10B (Durfee et al., 2008) was used as a  
134 cloning host. Plasmids constructs are listed in Table S1B. Primers are listed in Table S2. Sequences  
135 of interest cloned or mutated in this study were verified by DNA sequencing.

### 136 **2.2 Bacterial culture conditions**

137 Bacteria strains were grown at 37°C in LB medium containing ampicillin 100  $\mu$ g/ml for plasmid  
138 selection (in *E. coli*), spectinomycin 60  $\mu$ g/ml, kanamycin 5  $\mu$ g/ml or chloramphenicol 5  $\mu$ g/ml (for  
139 *B. subtilis*), and inducer molecules IPTG 0.5 mM, or D-xylose 0.5%, when necessary. *B. subtilis*  
140 strains containing pDG148 and pDG148-*yqaH* constructions were grown overnight in LB  
141 complemented with kanamycin. ON cultures were then diluted at OD<sub>600</sub> 0.01 on fresh media and  
142 grown to mid-exponential phase (OD<sub>600</sub> 0.3-0.4) prior to addition of IPTG. The effect of *yqaH*  
143 expressing on growth has been performed in 96 microwells plates in a final volume of 200  $\mu$ L.

### 144 **2.3 Strains constructions**

145 *yqaH* expression:

146 The *yqaH* wild type and mutated gene derivatives, were PCR-amplified using the *yqaH-HindIII-RBS-*  
147 *F/pYqaH-R* primer pair and inserted in plasmid pDG148 between HindIII and SalI restriction sites to  
148 be placed under control of the IPTG-inducible *Pspac* promoter (Stragier et al., 1988). The plasmid  
149 constructs were extracted from *E. coli* and transformed in *B. subtilis*. Expression of YqaH wild-type  
150 and mutated proteins were assessed using 3xflag-fusions.

151 *Construction of yqaH-gfp fusion:*

152 *yqaH* WT and mutated gene were PCR-amplified from the pGAD-*yqaH* yeast vector derivatives  
153 carrying either the WT or LOI mutations (see below) using *yqaH-apa* and *pYqaH-R* primer pair.  
154 DNA fragments were digested by *ApaI* and *SalI* and inserted in between *ApaI* and *XhoI* restriction  
155 sites of pSG1154m, a version of the pSG1154 vector (Lewis and Marston, 1999) encoding a  
156 monomeric version of the GFP (GFPm). Final constructions, consisting of translational fusions of  
157 the *gfpm* gene to the C-terminal region encoded *yqaH* under the control of the *P<sub>xyl</sub>* promoter, were  
158 transferred at the *amyE* locus of the *B. subtilis* chromosome by transforming competent *B. subtilis*  
159 cells with plasmid DNA. The transfer of single mutations in the *spo0A* chromosomal locus of *B.*  
160 *subtilis* were performed by gene replacement using the “pop-in pop-out” gene replacement method  
161 (Fabret et al., 2002; Tanaka et al., 2013).

162

163 *Yeast two-hybrid plasmid constructs:*

164 Genes encoding for full size YqaH, Spo0A, YabA and DnaA, as well as truncated DnaA (boundaries  
165 as illustrated figure 1D) were translationally fused to the activating domain (AD) or the binding  
166 domain (BD) of the transcriptional factor Gal4 by cloning into pGAD and pGBDU vectors,  
167 respectively (James et al., 1996). DNA fragments were amplified by PCR using appropriated primer  
168 sets (Table S2), double digested by *EcoR1* and *SalI* and ligated to corresponding pGAD or pGBDU  
169 linearized vector to generate a translational fusion with Gal4-AD or BD domains. Plasmid constructs  
170 were first transformed into *E. coli* prior to be introduced pJ69-4 $\alpha$  (pGAD-derivatives) or pJ69-4a  
171 (pGBDU-derivatives) haploid strain. pGAD- and pGBDU- plasmid derivatives were selected onto  
172 SD media lacking leucine (SD-L) or Uracyl (SD-U), respectively (James et al., 1996).

173

## 174 **2.4 Sporulation conditions**

175 Sporulation of *B. subtilis* was induced by nutrient limitation by the re-suspension in Sterlini-  
176 Mandelstam medium (SM) (Sterlini and Mandelstam, 1969). The beginning of sporulation ( $t_0$ ) is  
177 arbitrarily defined as the moment of re-suspension of the cells in SM. To study the effects of *yqaH*  
178 overexpression on *B. subtilis* sporulation, ON cultures of strains containing the pDG148  
179 constructions were then diluted in CH medium at starting OD600 of 0.05. When cultures reached an  
180 OD600=1, cells were re-suspended in an equivalent volume of SM medium complemented with  
181 0.5M IPTG ( $t_0$ ). To monitored sporulation efficiency, cells were collected at different times after  
182 sporulation induction ( $t_0$ ) until  $t_6$  (6 hours after induction, defined as a stage of production of mature  
183 spores) and  $t_{18}$ . Asymmetric septa and spores were enumerated by microscopic observations from all  
184 samples.

## 185 **2.5 Spores survival assay**

186 Cells were spread and grown ON at 30°C on DSM agar medium (Schaeffer et al., 1965), prior to be  
187 inoculated in preheated liquid DSM at OD600 0.1 and incubated at 37°C until reaching OD600 1.5.  
188 From this point (taken as  $T_0$ ) cultures were grown for 20 h to produce matured resistant spores.  
189 Samples were collected and half of the material was heated at 80°C (10 min) before plating to kill  
190 potential vegetative cells prior to be plated on LB. Colony counts were performed after 36 hours at



191 37°C. The percentage of spores was calculated as the ratio of colonies forming units (cfu) from  
192 heated and unheated samples.

## 193 **2.6 Yeast-two-hybrid assay**

194 The yeast-two-hybrid assays were performed as described (Marchadier et al., 2011; Noirot-Gros et  
195 al., 2002; Noirot-Gros et al., 2006). PJ69-4A and  $\alpha$  haploid yeast strains transformed by pGAD- and  
196 pGBDU- plasmid derivatives were mixed onto YPD-rich media plates to allow formation of diploids.  
197 Diploids containing both pGAD and pGBDU type of plasmids were then selected on SD-UL and  
198 interacting phenotypes were monitored by the ability of diploids to grow on SD-LUHA medium  
199 further lacking histidine (H) or adenine (A).

## 200 **2.7 Generation of Loss of Interaction (LOI) mutation**

201 YqaH\_LOI mutants were identified using a yeast two-hybrid-based assay as described elsewhere  
202 (Natrajan et al., 2009; Noirot-Gros et al., 2006; Quevillon-Cheruel et al., 2012). Random mutagenesis  
203 of the targeted genes were achieved by PCR amplification under mutagenic conditions that promotes  
204 less than one miss incorporation per amplification cycle (Noirot-Gros et al., 2006). For *yqaH*, a  
205 library of mutated pGAD-*yqaH*\* were constructed by gap-repair recombination into yeast (PJ69-4 $\alpha$   
206 strain). About 1000 individual transformants were organized in 96-well format on plates containing a  
207 defined medium lacking leucine (-L) to form an arrayed collection of AD-*yqaH*\* gene fusion  
208 mutants. This organized library was then mated with PJ69-4a strains containing either pGBDU-  
209 *dnaA* or pGBDU-*spo0A*, or an empty pGBDU plasmid as a negative control. Selective pressure for  
210 interacting phenotypes was then applied on media lacking -LUH or -LUA. Diploids that failed to  
211 grow on interaction selective media are considered as potentially expressing a loss-of-interaction  
212 (LOI) mutant of *yqaH*. Importantly, any particular AD-YqaH\*\_LOI proteins unable to trigger  
213 interacting phenotypes in the presence of BD-DnaA while still producing interacting phenotypes  
214 when expressed in the presence of BD-Spo0A is defined as a DnaA-specific LOI mutant. The  
215 corresponding *yqaH\_LOI* genes were retrieved from the initially organized haploid library and the  
216 mutations identified by DNA sequencing. Only mutations resulting from single substitutions were  
217 considered.

## 218 **2.8 Ori/Ter ratios measurements by qPCR**

219 To determine the ratio of amounts of origin-proximal and terminus-proximal DNA sequences, ON  
220 cultures of *B. subtilis* strains containing pDG148 or pDG148-*yqaH* plasmids were freshly diluted  
221 (OD<sub>600</sub>=0.01) in LB supplemented with kanamycin 5  $\mu$ g/mL in the presence of IPTG 0.5 mM, and  
222 grown at 37°C in up to mid-exponential phase (OD<sub>600</sub> = 0.3 to 0.4). A determined volume of culture  
223 was taken, mixed with similar volume of sodium azide solution (1%, 0.5% final) to stop all metabolic  
224 activities, and subjected to total lysis. Total genomic DNA extracts were kept at -80°C and thawed  
225 aliquots were used only once. Quantitative real time PCR were performed on a Mastercycler® ep  
226 realplex (Eppendorf) thermocycler device using ABsolute™ Blue QPCR SYBR® Green ROX Mix  
227 (ABgene), to amplify specific origin or terminus proximal sequences. Primers used for sequence  
228 amplification were chosen using Primer3Plus program (<http://www.bioinformatics.nl/cgi->

229 [bin/primer3plus/primer3plus.cgi/](http://www.bioinformatics.nl/cgi-bin/primer3plus/primer3plus.cgi/)). Amplification using the ORI pair of primers (oriL3F and oriL3R,  
230 Table S2) targeting the 4212889-4211510 region of the *B. subtilis* chromosome, yields a 128 bp size  
231 product corresponding to sequence at the left side of the origin. The terminus sequence is a 122 bp  
232 long fragment obtained from the TER pair of primers (terR3F and terR3R, Table S2) amplifying the  
233 region 2016845-2017711 at the right side of the terminus. The two primer pairs ORI and TER  
234 exhibited  $\geq 95\%$  of amplification efficiency. Data analysis was performed using the software  
235 Realplex (Eppendorf) and the quantification with the  $\Delta\Delta C_t$  method. The formula reflects the efficacy  
236 (Eff) of the primers ( $\text{Rate} = (1 + \text{Eff})^{(-\Delta\Delta C_t)}$ ).

237

## 238 **2.9 Gene expression quantifications**

239 To quantify the expression rates of genes regulated by DnaA, sample of cells (as collected for Ori/Ter  
240 ratios measurements) were also harvested in exponential growth at OD600=0.3-0.4, and RNA  
241 extractions were performed. To quantify the expression rates of genes regulated by Spo0A,  
242 sporulating cells were harvested when reaching stages T2-T3 of sporulation ( $t_{2,5}$ ) in SM medium. In  
243 both case, a determined volume of culture was mix with equivalent volume of centrifuged of sodium  
244 azide solution, and subjected to lysis followed by total RNA extraction as described (Nicolas et al.,  
245 2012). Total RNA was reversely transcribed and quantitative real time PCR were performed on  
246 cDNA. Primers used for sequence amplification were chosen using Primer3Plus program  
247 (<http://www.bioinformatics.nl/cgi-bin/primer3plus/primer3plus.cgi/>) and are detailed in Table S2.  
248 The couples of primers exhibited  $\geq 95\%$  amplification efficiency. Data analysis was performed using  
249 the software Realplex (Eppendorf) and the quantification with the  $\Delta\Delta C_t$  method. The formula reflects  
250 the efficacy (Eff) of the primers ( $\text{Rate} = (1 + \text{Eff})^{(-\Delta\Delta C_t)}$ ).

251

## 252 **2.10 Fluorescence microscopy**

253 The cytolocalization of proteins fused to GFP were observed by epifluorescence microscopy on  
254 vegetative or sporulating cells. The expression of *yqaH-gfp* gene fusions from the *B. subtilis amyE*  
255 chromosomal locus was triggered by supplementing exponential growth or sporulation cultures with  
256 xylose 0.5%. Sample of cells were harvested and rinsed in a minimal transparent media to avoid LB  
257 auto-fluorescence prior to be mounted onto 1.2% agarose pads. When necessary, bacterial  
258 membranes were stained with FM4-64 dye and nucleoids with DAPI. Fluorescence microscopy was  
259 performed on a Leica® DMR2A (100X UplanAPO objective with an aperture of 1.35.) coupled with  
260 CoolSnap HQ camera (Roper Scientific). System control and image processing were achieved using  
261 Metamorph software (Molecular Devices, Sunnyvale, CA, USA). Counts of cells, spores, foci or  
262 nucleoids were determined with the ImageJ® software, from at least 500 cells.

## 263 **2.11 Biofilm assay**

264 Production and analysis of air-to-liquid biofilm pellicles were performed as already described (Garcia  
265 Garcia et al., 2018). Briefly, strains expressing *yqaH*, wild type or K17E mutant derivative as well as  
266 control strain were grown in LB to OD600 of 1.0 and inoculated in 12-well culture plates containing

267 3.5 ml of MSgg media at starting OD<sub>600</sub> = 0.1. Cultures were maintained at 28°C and 70% humidity,  
268 with no agitation. After 48 hours, wells were filled out with MSgg media (slowly added at the edge)  
269 to lift the biofilm pellicles up to the top of the wells. The pellicles were then peeled-off onto a 2.5 cm  
270 diameter circular cover slide. The cover slides with intact biofilm pellicles were mounted onto an  
271 Attofluor Cell Chamber and stained with the Film Tracer FM 1-43 Green Biofilm dye (Thermo  
272 Fisher Scientific). Stained biofilms were observed using a spinning disk confocal microscope [Nikon  
273 Eclipse Ti-E coupled with CREST X-Light™ confocal imager; objectives Nikon CFI Plan Fluor  
274 10X, DIC, 10x/0.3 NA (WD = 16 mm); excitation was performed at 470 nm and emission recorded  
275 at 505 nm]. Images were processed using IMARIS software (Bitplane, South Windsor, CT, United  
276 States). Biofilm images were quantified using the surface function in IMARIS (XTension biofilm).  
277 Biovolumes were calculated based on total volume (μm<sup>3</sup>) per area (μm<sup>2</sup>) from n ≥ 4 samples.

## 278 **2.12 Protein immunodetection**

279 Production of 3FLAG-YqaH mutated derivatives was determined from total protein extract of *B.*  
280 *subtilis* by immuno-detection using monoclonal antibody anti-FLAG<sup>®</sup> M2 (Sigma). An IgG goat  
281 secondary antibody (Sigma) peroxidase conjugated was used at 1/10000e to detect the anti-FLAG<sup>®</sup>  
282 M2. Proteins immuno-detections were performed using the Clarity Western ECL kit (Biorad)  
283 according to the supplier's indications followed by chemiluminescence detection (ChemiDoc imager,  
284 Biorad). Images were analysed with the software Image Lab™.

## 285 **2.13 Structure predictions**

286 Secondary structures predictions were performed with the computer server Jpred 3  
287 (<http://www.compbio.dundee.ac.uk/www-jpred/>) and 3D structures predictions with the server Phyre<sup>2</sup>  
288 (<http://www.sbg.bio.ic.ac.uk/phyre2/html/page.cgi?id=index>).

289

# 290 **3 Results**

## 291 **3.1 The Skin element SPORF YqaH interacts with DnaA and Spo0A**

292 YqaH was originally identified as interacting with the replication initiator DnaA in a yeast two-  
293 hybrid screen of a *B. subtilis* genomic library (Noirot-Gros et al., 2002). Interestingly, we also  
294 identified YqaH as binding partner to Spo0A in a subsequent screen targeting the sporulation  
295 transcriptional factor (Figure 1B). Other DnaA-binding proteins SirA, Soj, DnaD and YabA also  
296 exert regulatory functions by interacting with different functional domains of DnaA (Figure 1B). To  
297 gain insights into YqaH mode of action, we characterized the minimal interacting domain of DnaA.  
298 We defined the C-terminal domain IV as necessary and sufficient to trigger the interaction  
299 phenotypes in a yeast two-hybrid binary assay (Figure 1C). This 118 AA long fragment spans residue  
300 328 to 446, and carries the signature motif for binding to double stranded DNA. This result  
301 distinguishes YqaH from other regulators, found to inhibit DnaA binding to *oriC* through interacting  
302 with domains I, responsible for self-oligomerization (SirA), and/or the central AAA+ ATPase  
303 domain III, (SirA, Soj, YabA and DnaD).



### 304 **3.2 YqaH expression triggers *dnaA*-related mutant phenotypes**

305 The interaction of YqaH with DnaA hints at a potential role in replication initiation control. We first  
306 investigated the effect of *yqaH* expression on cell growth and viability. *B. subtilis* strains carrying a  
307 plasmid expressing *yqaH* under control of an IPTG-inducible promoter or carrying a control plasmid  
308 with no expressed gene were treated under identical conditions. Addition of IPTG at early exponential  
309 stage specifically halted cell growth after two hours in cells expressing *yqaH* (Figure 2A). We found  
310 that cell viability was affected almost instantly in the presence of *yqaH*, leading to about 30x  
311 decrease after three hours (Figure 2A). Expression of *yqaH* also affects cell morphology leading to  
312 significant filamentation (Figure 2B). Closer examination of nucleoids revealed aberrant segregation  
313 of chromosomes with both diffused and compacted nucleoids unequally distributed within filaments,  
314 as well as a large portion of cells with no DNA. Most importantly, septum-entrapped nucleoids were  
315 also observed indicative of impaired nucleoid occlusion (NO) (Wu and Errington, 2011). These  
316 observations highlighted that the expression of YqaH triggered a large panel of chromosomal  
317 disorders suggestive of replication and segregation stress, and compatible with replication initiation  
318 deficiency, in agreement to earlier described (Kimura et al., 2010). We further investigate a role of  
319 YqaH by investigating DnaA-dependant transcriptional regulation. Among genes of the DnaA-  
320 regulon, active DnaA-ATP negatively regulate its own expression by binding to *dnaA* promoter  
321 region (Goranov et al., 2005). We monitored the *dnaA* mRNA levels in the presence or absence of  
322 YqaH and shown that expression of *yqaH* led to a 2 fold increase in *dnaA* mRNA, indicating a  
323 regulatory defect. Taking all together, these results are in agreement with a direct role of YqaH in  
324 counteracting DnaA activity.

### 326 **3.3 YqaH expression impairs sporulation**

327 We investigated the possible role of YqaH in Spo0A functions, by examining the effect of *yqaH*  
328 expression on sporulation. Cells carrying either the control or the *yqaH*-inducible plasmids were put  
329 to sporulate by the re-suspension method. To prevent an inhibitory effect of YqaH during vegetative  
330 growth, the *yqaH* gene expression was induced only at the onset of sporulation (T0). The formation  
331 of spores was monitored over time. Appearance of asymmetric septa at early stage (T2,5) was imaged  
332 by fluorescent microscopy after staining by a red-fluorescent membrane-dye, while the engulfed  
333 forespore (T6 and T18) was revealed using bright field (Figure. 3A). We observed that the counts of  
334 spore forming bacteria was drastically affected in the presence of YqaH (Figure 3B). We also  
335 examined the effect of *yqaH* expression on Spo0A-mediated transcriptional regulation. Among the  
336 genes under the direct control of Spo0A are *spoIIIE*, encoding the protein serine phosphatase SpoIIIE  
337 and *spoIIIGA*, encoding a pro-  $\sigma$ E processing protease (Molle et al., 2003). These two genes are  
338 involved in the activation of the alternative sporulation sigma factors  $\sigma$ F and  $\sigma$ E in the forespore and  
339 mother cell compartments, respectively (Baldus et al., 1994; Bradshaw et al., 2017; Errington and  
340 Wu, 2017; Fujita et al., 2005). Examination of their expression at the onset of sporulation revealed a  
341 significant downregulation (about 7 and 8 fold, respectively) in the presence of *yqaH* (Figure 3C).  
342 Altogether, these results pointed to a negative effect of YqaH in Spo0A-mediated function.

343

### 344 **3.4 Functional dissection of YqaH**

345 To further decipher YqaH mechanism, we looked for *yqaH* separation of function mutations that  
346 selectively affect its ability to interact to one protein partner while preserving its interaction with the  
347 other. Using a yeast two-hybrid based assay, we screened a *yqaH* mutant library specific loss-of-  
348 interaction (LOI) phenotypes (Figure S1A). This approach is based on the selection of single  
349 amino acid changes in the protein of interest that selectively disrupt the interaction with one partner  
350 without affecting the interaction with the other partner. Such screening favors the substitution of  
351 residues located at the interacting surface, leading to a LOI phenotype with the targeted partner,  
352 while preserving the overall 3D-structure of the protein that remains proficient for interaction with  
353 another partner (Natrajan et al., 2009; Noirot-Gros et al., 2006; Quevillon-Cheruel et al., 2012). We  
354 identify three single residue substitutions K17E, E38K and K48E that elicited a complete loss-of-  
355 interaction phenotype with DnaA without affecting interaction with Spo0A (Figure S1B, Table 1).  
356 Six additional substitutions affecting residues R16G, M27T, Y37H, E38V A44V and R56W were  
357 only partially abolishing interaction phenotypes with DnaA (Figure S1B, Table 1). Two substitutions,  
358 S25T and A40T were found to partially affect both interaction with DnaA and Spo0A, and 4  
359 substitutions, D10G, S20L, L28P, L43P and L57P were totally abolishing interaction phenotypes  
360 with both DnaA and Spo0A (Figure S1B, Table1). In the latter case, these substitutions could have  
361 affected the overall YqaH 3D-structure integrity. Is it worthy of note that, while several specific  
362 DnaA-LOI mutants were obtained, no substitution that specifically prevent interaction with Spo0A  
363 were identified in our screen. The YqaH protein is predicted to fold into three successive alpha helix  
364 (Figure S1B). The residues important for interaction with DnaA mapped within the two main helix  
365 presumably involved in a coiled-coil structure.

366

### 367 **3.5 DnaA-LOI mutants of *yqaH* restore replication and transcriptional regulation defects** 368 **caused by YqaH expression**

369 We investigated the effect of two DnaA-LOI mutants carrying substitutions K17E and R56W,  
370 exhibiting total (K17E) or partial (R56W) loss of interaction phenotypes with YqaH in our yeast two-  
371 hybride assay. (Table 1). Both substitutions abolished the nucleoid segregation defects resulting from  
372 *yqaH* expression (Figure 4A). To rule out that this phenotypic compensation could potentially result  
373 from expression of the gene copy from the silent *SknR* operon, we confirmed that the only source of  
374 YqaH in the cell arisen from plasmidic expression (Figure S3). No YqaH protein was detected in  
375 cells carrying a control plasmid devoid of *yqaH* coding sequence, indicating that the chromosomal  
376 copy remained completely silent during our experimental conditions.

377 We further examined the effect of YqaH on replication initiation by measuring the ratio between  
378 chromosomal origin-proximal and terminus-proximal sequences (Figure 4B). The average of origin-  
379 to-terminus (*ori:ter*) ratio was determined by qPCR on genomic DNA harvested from exponentially  
380 growing cells as previously described (Soufo et al., 2008). The *ori:ter* ratio was about 4 in control  
381 cells that do not expressed *yqaH*, indicating that two events of replication initiation has taken place in  
382 most cells, in agreement to already observed in similar experimental conditions (Murray and Koh,  
383 2014). In the presence of *yqaH*, the *ori:ter* ratio dropped to 2, indicating that only one replication

384 initiation event per cell has taken place in average (Figure 4B). This observation suggests that the  
385 YqaH protein could exerts a negative effect on replication initiation by counteracting DnaA activity.  
386 We observed that this effect was abolished upon expression of the *yqaH*\_DnaA LOI variants carrying  
387 either the K17E or the R56W substitutions (Figure 4B). In cells, expressing YqaH-R56W the  
388 replication initiation rate was similar to control cells while expression of YqaH-K17E restored about  
389 75% of the initiation rate indicating a significant but partial complementation. In another assay, we  
390 analyzed the number of chromosomal origin in individual cells using the *lacO*/LacI-GFP system.  
391 Cells carrying a *lacO* repeat array near the replication origin and expressing the LacI-GFP fusion  
392 were observed by fluorescence microscopy, in the presence of absence of YqaH (Figure 4C). In the  
393 absence of YqaH, the number of lacI foci per nucleoid was found to be 3.6 in average, in agreement  
394 with the *ori-to-ter* ratio (Figure 4D). This number dropped to 1 upon expression of YqaH, suggestive  
395 of replication deficiency. As observed earlier, cell were also exhibiting aberrant nucleoids and  
396 segregation defects. Conversely, expression of YqaH-K17E mutant fully restored nucleoid and cell  
397 morphology and partially restored replication defects with an average of LacI-GFP foci about 2.3.  
398 Together these observations indicate that YqaH binds to DnaA and antagonized its activity in  
399 replication initiation.

400 To substantiate the role of YqaH/ DnaA interaction, we also examined the effect of the DnaA-LOI  
401 mutant on *dnaA* transcription (Figure 4E). We found that the loss of DnaA-mediated control of *dnaA*  
402 expression in the presence of wild type YqaH was restored by the introduction of both K17E and  
403 R56W substitutions. This result further supports the conclusion that the binding of YqaH to DnaA  
404 antagonizes DnaA functions.

405

### 406 **3.6 The YqaH-mediated defects in sporulation and biofilm formation requires interaction** 407 **with DnaA.**

408 Although we did not identified any YqaH\_SpoA-LOI mutant in our screen, we thought that the  
409 YqaH\_K17E DnaA-LOI mutant provided for a convenient separation-of-function for a more reliable  
410 investigation of the potential role of *yqaH* in *spo0A*-mediated phenotypes. Indeed, this K17E variant  
411 remains fully proficient for interacting with Spo0A in our yeast 2HB assays, allowing to investigate  
412 the role of *yqaH* during sporulation while circumventing DnaA-related defects during vegetative  
413 cycle. We compared the sporulation efficiencies of strains expressing the wild-type YqaH or the  
414 YqaH\_K17E variant in both 168 and TF8A (devoid of Skin element) backgrounds. The percent of  
415 cells ongoing sporulation was determined at t6 (i.e stage VI, refers as the spore maturation stage,  
416 Figure 5A). Surprisingly, we found that the K17E-LOI substitution abolished the defect elicited by  
417 the wild type YqaH (Figure 5). This observation indicates that the sporulation deficiency mediated by  
418 YqaH requires its ability to interact with DnaA. To further investigate the potential role of YqaH in  
419 Spo0A-related processes, we also examined its effect on biofilm formation (Figure 5B, Figure S4).  
420 We observed that the production of biofilm pellicles at the air-medium interface was impaired in  
421 strains expressing YqaH, leading to a loss of biomass and cohesion. Damaged biofilm pellicles were  
422 not observed in cells expressing the YqaH\_K17E DnaA-LOI mutant (Figure 5B, Figure S4B,C) thus  
423 pointing to a role of DnaA during biofilm formation.

## 424 **4 Discussion**

425 Our study sheds light on the mechanism of action of YqaH, a small protein with antimicrobial  
426 activities encoded by the *B. subtilis* skin element. By physically interacting with two master  
427 regulators DnaA and Spo0A, the YqaH protein holds the promise to inhibit two essential cellular  
428 processes under two different life styles of the bacteria. Upon nutrient stress and other environmental  
429 conditions, *B. subtilis* cells switch from vegetative growth to sporulation or biofilm formation. DnaA  
430 is essential during vegetative growth, acting as both replication initiator and transcriptional factor,  
431 while the response regulator Spo0A controls developmental transitions.

432 In *Bacillus*, several regulatory proteins inhibit DnaA by targeting different functional domains of the  
433 protein. In cells committed to sporulation, the protein SirA prevents DnaA from binding to the  
434 replication origin OriC by interacting with its structural domains I and III (Jameson et al., 2014).  
435 During vegetative growth, the regulatory proteins YabA interacts with DnaA during most of the cell  
436 cycle (Felicori et al., 2016; Noiro-Gros et al., 2006; Soufo et al., 2008). YabA as well as the  
437 primosomal protein DnaD affect DnaA cooperative binding to OriC by interacting with DnaA  
438 structural domain III (Merrikh and Grossman, 2011; Scholefield and Murray, 2013). Finally, the  
439 ATPase protein Soj negatively regulates DnaA by also interacting with the structural domain III,  
440 preventing oligomerization (Scholefield et al., 2011). Our results indicate that YqaH controls DnaA  
441 activity by a mode distinct from the other known regulators, specifically by contacting the structural  
442 domain IV of DnaA that is responsible for DnaA-box sequence recognition (Fujikawa et al., 2003).

443 *B. subtilis* cells expressing YqaH exhibited various DnaA-related phenotypes that spanned from a  
444 general growth defect, aberrant nucleoid morphology, impaired replication initiation and loss of  
445 transcriptional control (Figure 2 and 4). These cells also exhibited Spo0A-related phenotypes such as  
446 a dramatic reduction of sporulation efficiency (Figure 3A, B), an inhibition of the expression of  
447 Spo0A-dependent genes (Figure 3C) and a strong impairment of biofilm formation (Figure 5). These  
448 observations are in agreement with a role of YqaH in counteracting both DnaA and Spo0A activities  
449 during vegetative growth and sporulation. However, it is well documented that initiation of  
450 sporulation is closely coupled to the cell cycle and DNA replication in order to ensure that  
451 sporulation occurs only in cells containing two fully replicated chromosomes (Veening et al., 2009).  
452 Because of this intricate relationship between DNA replication and sporulation, it is difficult to  
453 separate the phenotypes of YqaH related to its interactions with DnaA on one hand and Spo0A on the  
454 other hand. By using YqaH single point mutants unable to interact with DnaA while remaining  
455 proficient for interaction with Spo0A, we identified mutational pattern on YqaH (Figure S2) and  
456 demonstrated their direct involvement in DnaA-related a loss-of-function phenotype. In our screens,  
457 we did not obtain YqaH mutants that affected only the interaction with Spo0A. However, the YqaH  
458 DnaA\_LOI mutants revealed that sporulation and biofilm formation phenotypes of YqaH expression  
459 required interaction with DnaA. Thus, we could not establish whether interaction with Spo0A plays a  
460 role in these phenotypes. Our results could be explained by the role of DnaA as a pleiotropic  
461 transcriptional regulator controlling the expression of several sporulation genes, including the  
462 checkpoint histidine kinase Sda (Washington et al., 2017). Sda is known to bind to KinA, inhibiting  
463 its phosphorylation activity required to activate Spo0A (Burkholder et al., 2001). A recent study

464 highlighted that a large part of the role of DnaA into gene expression is indirect and mediated by sda  
465 (Washington et al., 2017). Sda is positively regulated by both DnaA and Spo0A, and a coupling  
466 between expression of Sda and the replication cycle results in cyclic bursts of Spo0A activation  
467 (Narula et al., 2015). Many genes that appear regulated by DnaA are involved in sporulation and  
468 biofilm formation, illustrating the complexity of regulatory circuits that control transitions in  
469 lifestyle. In conclusion, our study characterizes the role of small peptide YqaH that negatively  
470 interferes with a broad range of cellular processes by counteracting the activity of DnaA. Controlling  
471 YqaH expression could be part of a strategy to prevent the dissemination of engineered *B. subtilis*  
472 strains in a controlled environment.

## 473 **5 Acknowledgements**

## 474 **6 Author contributions**

475 MV and MFNG designed the experiments. MV performed all experiments. MV and MFNG  
476 interpreted the results. MFNG wrote the manuscript. Both authors contributed to data interpretation  
477 and reviewed the final version of the manuscript.

## 478 **7 Conflict of Interest**

479 The authors declare that the research was conducted in the absence of any commercial or financial  
480 relationships that could be construed as a potential conflict of interest.

## 481 **8 Supplementary material**

482 Figure S1: Yeast 2HB screening of a yqaH gene mutant library for specific LOI phenotypes.

483 Figure S2: Mapping of the YqaH single LOI mutations with DnaA

484 Figure S3: Immunodetection of YqaH in cell extracts after induction

485 Figure S4: DnaA-dependant YqaH-mediated defects in biofilm formation

486 Figure S5: ORF conservation within bacillus species

487 Table S1: Strains and Plasmids

488 Table S2: Primers list

489

## 490 **9 References**

491 Albuquerque, J.P., Tobias-Santos, V., Rodrigues, A.C., Mury, F.B., and da Fonseca, R.N. (2015).  
492 small ORFs: A new class of essential genes for development. *Genetics and molecular biology* 38,  
493 278-283.



- 494 An, X., Zhang, C., Sclafani, R.A., Seligman, P., and Huang, M. (2015). The late-annotated small  
495 ORF LSO1 is a target gene of the iron regulon of *Saccharomyces cerevisiae*. *MicrobiologyOpen* 4,  
496 941-951.
- 497 Araujo-Bazan, L., Huecas, S., Valle, J., Andreu, D., and Andreu, J.M. (2019). Synthetic  
498 developmental regulator MciZ targets FtsZ across *Bacillus* species and inhibits bacterial division.  
499 *Mol Microbiol* 111, 965-980.
- 500 Baldus, J.M., Green, B.D., Youngman, P., and Moran, C.P., Jr. (1994). Phosphorylation of *Bacillus*  
501 *subtilis* transcription factor Spo0A stimulates transcription from the spoIIG promoter by enhancing  
502 binding to weak 0A boxes. *J Bacteriol* 176, 296-306.
- 503 Bisson-Filho, A.W., Discola, K.F., Castellen, P., Blasios, V., Martins, A., Sforca, M.L., Garcia, W.,  
504 Zeri, A.C., Erickson, H.P., Dessen, A., *et al.* (2015). FtsZ filament capping by MciZ, a  
505 developmental regulator of bacterial division. *Proc Natl Acad Sci U S A* 112, E2130-2138.
- 506 Bonilla, C.Y., and Grossman, A.D. (2012). The primosomal protein DnaD inhibits cooperative DNA  
507 binding by the replication initiator DnaA in *Bacillus subtilis*. *J Bacteriol* 194, 5110-5117.
- 508 Bradshaw, N., Levdivikov, V.M., Zimanyi, C.M., Gaudet, R., Wilkinson, A.J., and Losick, R. (2017).  
509 A widespread family of serine/threonine protein phosphatases shares a common regulatory switch  
510 with proteasomal proteases. *Elife* 6.
- 511 Burkholder, W.F., Kurtser, I., and Grossman, A.D. (2001). Replication initiation proteins regulate a  
512 developmental checkpoint in *Bacillus subtilis*. *Cell* 104, 269-279.
- 513 Chabes, A., Domkin, V., and Thelander, L. (1999). Yeast Sml1, a protein inhibitor of ribonucleotide  
514 reductase. *J Biol Chem* 274, 36679-36683.
- 515 Chu, Q., Ma, J., and Saghatelian, A. (2015). Identification and characterization of sORF-encoded  
516 polypeptides. *Crit Rev Biochem Mol Biol* 50, 134-141.
- 517 Couso, J.P., and Patraquim, P. (2017). Classification and function of small open reading frames.  
518 *Nature reviews Molecular cell biology* 18, 575-589.
- 519 Cunningham, K.A., and Burkholder, W.F. (2009). The histidine kinase inhibitor Sda binds near the  
520 site of autophosphorylation and may sterically hinder autophosphorylation and phosphotransfer to  
521 Spo0F. *Mol Microbiol* 71, 659-677.
- 522 Dolde, U., Rodrigues, V., Straub, D., Bhati, K.K., Choi, S., Yang, S.W., and Wenkel, S. (2018).  
523 Synthetic MicroProteins: Versatile Tools for Posttranslational Regulation of Target Proteins. *Plant*  
524 *physiology* 176, 3136-3145.
- 525 Dubnau, E.J., Carabetta, V.J., Tanner, A.W., Miras, M., Diethmaier, C., and Dubnau, D. (2016). A  
526 protein complex supports the production of Spo0A-P and plays additional roles for biofilms and the  
527 K-state in *Bacillus subtilis*. *Mol Microbiol* 101, 606-624.
- 528 Durfee, T., Nelson, R., Baldwin, S., Plunkett, G., Burland, V., Mau, B., Petrosino, J.F., Qin, X.,  
529 Muzny, D.M., Ayele, M., *et al.* (2008). The complete genome sequence of *Escherichia coli* DH10B:  
530 Insights into the biology of a laboratory workhorse. *Journal of Bacteriology* 190, 2597-2606.
- 531 Ebmeier, S.E., Tan, I.S., Clapham, K.R., and Ramamurthi, K.S. (2012). Small proteins link coat and  
532 cortex assembly during sporulation in *Bacillus subtilis*. *Mol Microbiol* 84, 682-696.
- 533 Erpf, P.E., and Fraser, J.A. (2018). The Long History of the Diverse Roles of Short ORFs: sPEPs in  
534 Fungi. *Proteomics* 18, e1700219.

- 535 Errington, J., and Wu, L.J. (2017). Cell Cycle Machinery in *Bacillus subtilis*. Sub-cellular  
536 biochemistry *84*, 67-101.
- 537 Fabret, C., Ehrlich, S.D., and Noirot, P. (2002). A new mutation delivery system for genome-scale  
538 approaches in *Bacillus subtilis*. *Mol Microbiol* *46*, 25-36.
- 539 Felicori, L., Jameson, K.H., Roblin, P., Fogg, M.J., Garcia-Garcia, T., Ventroux, M., Cherrier, M.V.,  
540 Bazin, A., Noirot, P., Wilkinson, A.J., *et al.* (2016). Tetramerization and interdomain flexibility of  
541 the replication initiation controller YabA enables simultaneous binding to multiple partners. *Nucleic*  
542 *Acids Res* *44*, 449-463.
- 543 Friedman, R.C., Kalkhof, S., Doppelt-Azeroual, O., Mueller, S.A., Chovancova, M., von Bergen, M.,  
544 and Schwikowski, B. (2017). Common and phylogenetically widespread coding for peptides by  
545 bacterial small RNAs. *BMC genomics* *18*, 553.
- 546 Fujita, M., Gonzalez-Pastor, J.E., and Losick, R. (2005). High- and low-threshold genes in the Spo0A  
547 regulon of *Bacillus subtilis*. *J Bacteriol* *187*, 1357-1368.
- 548 Graeff, M., and Wenkel, S. (2012). Regulation of protein function by interfering protein species.  
549 *Biomolecular concepts* *3*, 71-78.
- 550 Ha, U.H., Kim, J., Badrane, H., Jia, J., Baker, H.V., Wu, D., and Jin, S. (2004). An in vivo inducible  
551 gene of *Pseudomonas aeruginosa* encodes an anti-ExsA to suppress the type III secretion system.  
552 *Mol Microbiol* *54*, 307-320.
- 553 Handler, A.A., Lim, J.E., and Losick, R. (2008). Peptide inhibitor of cytokinesis during sporulation  
554 in *Bacillus subtilis*. *Mol Microbiol* *68*, 588-599.
- 555 He, C., Jia, C., Zhang, Y., and Xu, P. (2018). Enrichment-Based Proteogenomics Identifies  
556 Microproteins, Missing Proteins, and Novel smORFs in *Saccharomyces cerevisiae*. *J Proteome Res*  
557 *17*, 2335-2344.
- 558 Hellens, R.P., Brown, C.M., Chisnall, M.A.W., Waterhouse, P.M., and Macknight, R.C. (2016). The  
559 Emerging World of Small ORFs. *Trends in plant science* *21*, 317-328.
- 560 Hood, I.V., and Berger, J.M. (2016). Viral hijacking of a replicative helicase loader and its  
561 implications for helicase loading control and phage replication. *Elife* *5*.
- 562 Hwang, D.S., and Kornberg, A. (1992). Opening of the replication origin of *Escherichia coli* by  
563 DnaA protein with protein HU or IHF. *J Biol Chem* *267*, 23083-23086.
- 564 James, P., Halladay, J., and Craig, E.A. (1996). Genomic libraries and a host strain designed for  
565 highly efficient two-hybrid selection in yeast. *Genetics* *144*, 1425-1436.
- 566 Jameson, K.H., and Wilkinson, A.J. (2017). Control of Initiation of DNA Replication in *Bacillus*  
567 *subtilis* and *Escherichia coli*. *Genes* *8*.
- 568 Kastenmayer, J.P., Ni, L., Chu, A., Kitchen, L.E., Au, W.C., Yang, H., Carter, C.D., Wheeler, D.,  
569 Davis, R.W., Boeke, J.D., *et al.* (2006). Functional genomics of genes with small open reading  
570 frames (sORFs) in *S. cerevisiae*. *Genome research* *16*, 365-373.
- 571 Katayama, T., Kasho, K., and Kawakami, H. (2017). The DnaA Cycle in *Escherichia coli*:  
572 Activation, Function and Inactivation of the Initiator Protein. *Front Microbiol* *8*, 2496.
- 573 Katayama, T., Ozaki, S., Keyamura, K., and Fujimitsu, K. (2010). Regulation of the replication  
574 cycle: conserved and diverse regulatory systems for DnaA and oriC. *Nat Rev Microbiol* *8*, 163-170.

- 575 Kimura, T., Amaya, Y., Kobayashi, K., Ogasawara, N., and Sato, T. (2010). Repression of sigK  
576 intervening (skin) element gene expression by the CI-like protein SknR and effect of SknR depletion  
577 on growth of *Bacillus subtilis* cells. *J Bacteriol* *192*, 6209-6216.
- 578 Lee, Y.D., Wang, J., Stubbe, J., and Elledge, S.J. (2008). Dif1 is a DNA-damage-regulated facilitator  
579 of nuclear import for ribonucleotide reductase. *Molecular cell* *32*, 70-80.
- 580 Leonard, A.C., and Grimwade, J.E. (2011). Regulation of DnaA assembly and activity: taking  
581 directions from the genome. *Annual review of microbiology* *65*, 19-35.
- 582 Lewis, P.J., and Marston, A.L. (1999). GFP vectors for controlled expression and dual labelling of  
583 protein fusions in *Bacillus subtilis*. *Gene* *227*, 101-110.
- 584 Liu, J., Dehbi, M., Moeck, G., Arhin, F., Bauda, P., Bergeron, D., Callejo, M., Ferretti, V., Ha, N.,  
585 Kwan, T., *et al.* (2004). Antimicrobial drug discovery through bacteriophage genomics. *Nature*  
586 *biotechnology* *22*, 185-191.
- 587 Lloyd, C.R., Park, S., Fei, J., and Vanderpool, C.K. (2017). The Small Protein SgrT Controls  
588 Transport Activity of the Glucose-Specific Phosphotransferase System. *J Bacteriol* *199*.
- 589 Marchadier, E., Carballido-Lopez, R., Brinster, S., Fabret, C., Mervelet, P., Bessieres, P., Noirot-  
590 Gros, M.F., Fromion, V., and Noirot, P. (2011). An expanded protein-protein interaction network in  
591 *Bacillus subtilis* reveals a group of hubs: Exploration by an integrative approach. *Proteomics* *11*,  
592 2981-2991.
- 593 Martin, E., Williams, H.E.L., Pitoulias, M., Stevens, D., Winterhalter, C., Craggs, T.D., Murray, H.,  
594 Searle, M.S., and Soultanas, P. (2019). DNA replication initiation in *Bacillus subtilis*: structural and  
595 functional characterization of the essential DnaA-DnaD interaction. *Nucleic Acids Res* *47*, 2101-  
596 2112.
- 597 Messer, W. (2002). The bacterial replication initiator DnaA. DnaA and oriC, the bacterial mode to  
598 initiate DNA replication. *FEMS microbiology reviews* *26*, 355-374.
- 599 Messer, W., and Weigel, C. (2003). DnaA as a transcription regulator. *Methods in enzymology* *370*,  
600 338-349.
- 601 Miravet-Verde, S., Ferrar, T., Espadas-Garcia, G., Mazzolini, R., Gharrab, A., Sabido, E., Serrano,  
602 L., and Lluch-Senar, M. (2019). Unraveling the hidden universe of small proteins in bacterial  
603 genomes. *Molecular systems biology* *15*, e8290.
- 604 Moeller, R., Setlow, P., Horneck, G., Berger, T., Reitz, G., Rettberg, P., Doherty, A.J., Okayasu, R.,  
605 and Nicholson, W.L. (2008). Roles of the major, small, acid-soluble spore proteins and spore-specific  
606 and universal DNA repair mechanisms in resistance of *Bacillus subtilis* spores to ionizing radiation  
607 from X rays and high-energy charged-particle bombardment. *J Bacteriol* *190*, 1134-1140.
- 608 Molle, V., Fujita, M., Jensen, S.T., Eichenberger, P., Gonzalez-Pastor, J.E., Liu, J.S., and Losick, R.  
609 (2003). The Spo0A regulon of *Bacillus subtilis*. *Mol Microbiol* *50*, 1683-1701.
- 610 Mott, M.L., and Berger, J.M. (2007). DNA replication initiation: mechanisms and regulation in  
611 bacteria. *Nat Rev Microbiol* *5*, 343-354.
- 612 Murray, H., and Errington, J. (2008). Dynamic control of the DNA replication initiation protein  
613 DnaA by Soj/ParA. *Cell* *135*, 74-84.
- 614 Murray, H., and Koh, A. (2014). Multiple regulatory systems coordinate DNA replication with cell  
615 growth in *Bacillus subtilis*. *PLoS Genet* *10*, e1004731.

- 616 Natrajan, G., Noirot-Gros, M.F., Zawilak-Pawlik, A., Kapp, U., and Terradot, L. (2009). The  
617 structure of a DnaA/HobA complex from *Helicobacter pylori* provides insight into regulation of  
618 DNA replication in bacteria. *Proc Natl Acad Sci U S A* *106*, 21115-21120.
- 619 Nicolas, P., Mader, U., Dervyn, E., Rochat, T., Leduc, A., Pigeonneau, N., Bidnenko, E., Marchadier,  
620 E., Hoebeke, M., Aymerich, S., *et al.* (2012). Condition-dependent transcriptome reveals high-level  
621 regulatory architecture in *Bacillus subtilis*. *Science* *335*, 1103-1106.
- 622 Noirot-Gros, M.F., Dervyn, E., Wu, L.J., Mervelet, P., Errington, J., Ehrlich, S.D., and Noirot, P.  
623 (2002). An expanded view of bacterial DNA replication. *Proc Natl Acad Sci U S A* *99*, 8342-8347.
- 624 Noirot-Gros, M.F., Velten, M., Yoshimura, M., McGovern, S., Morimoto, T., Ehrlich, S.D.,  
625 Ogasawara, N., Polard, P., and Noirot, P. (2006). Functional dissection of YabA, a negative regulator  
626 of DNA replication initiation in *Bacillus subtilis*. *Proc Natl Acad Sci U S A* *103*, 2368-2373.
- 627 Ozaki, S., and Katayama, T. (2009). DnaA structure, function, and dynamics in the initiation at the  
628 chromosomal origin. *Plasmid* *62*, 71-82.
- 629 Quevillon-Cheruel, S., Campo, N., Mirouze, N., Mortier-Barriere, I., Brooks, M.A., Boudes, M.,  
630 Durand, D., Soulet, A.L., Lisboa, J., Noirot, P., *et al.* (2012). Structure-function analysis of  
631 pneumococcal DprA protein reveals that dimerization is crucial for loading RecA recombinase onto  
632 DNA during transformation. *Proc Natl Acad Sci U S A* *109*, E2466-2475.
- 633 Riber, L., Frimodt-Moller, J., Charbon, G., and Lobner-Olesen, A. (2016). Multiple DNA Binding  
634 Proteins Contribute to Timing of Chromosome Replication in *E. coli*. *Frontiers in molecular*  
635 *biosciences* *3*, 29.
- 636 Rowland, S.L., Burkholder, W.F., Cunningham, K.A., Maciejewski, M.W., Grossman, A.D., and  
637 King, G.F. (2004). Structure and mechanism of action of Sda, an inhibitor of the histidine kinases  
638 that regulate initiation of sporulation in *Bacillus subtilis*. *Molecular cell* *13*, 689-701.
- 639 Saghatelian, A., and Couso, J.P. (2015). Discovery and characterization of smORF-encoded bioactive  
640 polypeptides. *Nat Chem Biol* *11*, 909-916.
- 641 Samayoa, J., Yildiz, F.H., and Karplus, K. (2011). Identification of prokaryotic small proteins using a  
642 comparative genomic approach. *Bioinformatics* *27*, 1765-1771.
- 643 Schaeffer, P., Millet, J., and Aubert, J.P. (1965). Catabolic repression of bacterial sporulation. *Proc*  
644 *Natl Acad Sci U S A* *54*, 704-711.
- 645 Schmalisch, M., Maiques, E., Nikolov, L., Camp, A.H., Chevreux, B., Muffler, A., Rodriguez, S.,  
646 Perkins, J., and Losick, R. (2010). Small genes under sporulation control in the *Bacillus subtilis*  
647 genome. *J Bacteriol* *192*, 5402-5412.
- 648 Scholefield, G., and Murray, H. (2013). YabA and DnaD inhibit helix assembly of the DNA  
649 replication initiation protein DnaA. *Mol Microbiol* *90*, 147-159.
- 650 Setlow, P. (2007). I will survive: DNA protection in bacterial spores. *Trends in microbiology* *15*,  
651 172-180.
- 652 Skarstad, K., and Katayama, T. (2013). Regulating DNA replication in bacteria. *Cold Spring Harbor*  
653 *perspectives in biology* *5*, a012922.
- 654 Slavoff, S.A., Heo, J., Budnik, B.A., Hanakahi, L.A., and Saghatelian, A. (2014). A human short  
655 open reading frame (sORF)-encoded polypeptide that stimulates DNA end joining. *J Biol Chem* *289*,  
656 10950-10957.

- 657 Slavoff, S.A., Mitchell, A.J., Schwaid, A.G., Cabili, M.N., Ma, J., Levin, J.Z., Karger, A.D., Budnik,  
658 B.A., Rinn, J.L., and Saghatelian, A. (2013). Peptidomic discovery of short open reading frame-  
659 encoded peptides in human cells. *Nat Chem Biol* 9, 59-64.
- 660 Soufo, C.D., Soufo, H.J., Noirot-Gros, M.F., Steindorf, A., Noirot, P., and Graumann, P.L. (2008).  
661 Cell-cycle-dependent spatial sequestration of the DnaA replication initiator protein in *Bacillus*  
662 *subtilis*. *Dev Cell* 15, 935-941.
- 663 Staudt, A.C., and Wenkel, S. (2011). Regulation of protein function by 'microProteins'. *EMBO*  
664 *reports* 12, 35-42.
- 665 Sterlini, J.M., and Mandelstam, J. (1969). Commitment to sporulation in *Bacillus subtilis* and its  
666 relationship to development of actinomycin resistance. *The Biochemical journal* 113, 29-37.
- 667 Storz, G., Wolf, Y.I., and Ramamurthi, K.S. (2014). Small proteins can no longer be ignored. *Annu*  
668 *Rev Biochem* 83, 753-777.
- 669 Stragier, P., Bonamy, C., and Karmazyn-Campelli, C. (1988). Processing of a sporulation sigma  
670 factor in *Bacillus subtilis*: how morphological structure could control gene expression. *Cell* 52, 697-  
671 704.
- 672 Straub, D., and Wenkel, S. (2017). Cross-Species Genome-Wide Identification of Evolutionary  
673 Conserved MicroProteins. *Genome biology and evolution* 9, 777-789.
- 674 Tanaka, K., Henry, C.S., Zinner, J.F., Jolivet, E., Cohoon, M.P., Xia, F., Bidnenko, V., Ehrlich, S.D.,  
675 Stevens, R.L., and Noirot, P. (2013). Building the repertoire of dispensable chromosome regions in  
676 *Bacillus subtilis* entails major refinement of cognate large-scale metabolic model. *Nucleic Acids Res*  
677 41, 687-699.
- 678 VanOrsdel, C.E., Kelly, J.P., Burke, B.N., Lein, C.D., Oufiero, C.E., Sanchez, J.F., Wimmers, L.E.,  
679 Hearn, D.J., Abuikhdair, F.J., Barnhart, K.R., *et al.* (2018). Identifying New Small Proteins in  
680 *Escherichia coli*. *Proteomics* 18, e1700064.
- 681 Veening, J.W., Murray, H., and Errington, J. (2009). A mechanism for cell cycle regulation of  
682 sporulation initiation in *Bacillus subtilis*. *Genes & development* 23, 1959-1970.
- 683 Westers, H., Dorenbos, R., van Dijl, J.M., Kabel, J., Flanagan, T., Devine, K.M., Jude, F., Seror, S.J.,  
684 Beekman, A.C., Darmon, E., *et al.* (2003). Genome engineering reveals large dispensable regions in  
685 *Bacillus subtilis*. *Mol Biol Evol* 20, 2076-2090.
- 686 Wu, L.J., and Errington, J. (2011). Nucleoid occlusion and bacterial cell division. *Nat Rev Microbiol*  
687 10, 8-12.
- 688 Wu, W., and Jin, S. (2005). PtrB of *Pseudomonas aeruginosa* suppresses the type III secretion system  
689 under the stress of DNA damage. *J Bacteriol* 187, 6058-6068.
- 690 Yang, X., Jensen, S.I., Wulff, T., Harrison, S.J., and Long, K.S. (2016). Identification and validation  
691 of novel small proteins in *Pseudomonas putida*. *Environmental microbiology reports* 8, 966-974.
- 692 Zanet, J., Benrabah, E., Li, T., Pelissier-Monier, A., Chanut-Delalande, H., Ronsin, B., Bellen, H.J.,  
693 Payre, F., and Plaza, S. (2015). Pri sORF peptides induce selective proteasome-mediated protein  
694 processing. *Science* 349, 1356-1358.
- 695 Zuber, P. (2001). A peptide profile of the *Bacillus subtilis* genome. *Peptides* 22, 1555-1577.
- 696



## 697 10 Legends to figures

### 698 Figure 1

699 **A)** SknR transcriptionally repress the *yqaF-yqaN* operon of the skin element. **B-C) Yeast two hybrid**  
700 **interaction assay.** Haploid yeast strains expressing *yqaH*, *dnaA* and *yabA* infusion with the BD and  
701 AD domains of *gal4* are separately introduced into haploid yeast strains. Binary interactions are  
702 tested by the ability of diploids to grow onto selective media. **D) DnaA interaction with YqaH and**  
703 **regulators.** Numbers refer to amino acid boundaries (see also Figure S1). Schematic representation  
704 of the architecture of the four functional domains of DnaA with associated functions as illustrated by  
705 colors. The binding of negative regulators to their targeted DnaA functional domain is illustrated  
706 accordingly. The YqaH interacting domains of DnaA with associated yeast 2HB interacting  
707 phenotypes (IP) are indicated. (+ and -) refers growth or absence of growth on selective media,  
708 reflecting interacting or loss of interaction phenotype, respectively.

709

### 710 Figure 2:

711 **YqaH triggers *dnaA*-related phenotypes. A) Effect of *yqaH* expression on growth.** Cells  
712 carrying plasmids pDG148 (control, plain lines) or pDG148-*yqaH* (dashed lines) were examined in  
713 the presence of IPTG (0.5 mM) over 5 hours. Growth was monitored either by OD600 (left x-axe,  
714 black) or by cells viability, measured as the number of colony forming units per ml, normalized by  
715 OD600 (right x-axe, red). **B) Nucleoid morphological defects.** Samples of living cells (OD or  
716 time?) were examined by fluorescent microscopy after staining with of FM4-64 (membrane dye  
717 false-colored in red) and DAPI (DNA dye, false-colored in blue). White and yellow arrows indicate  
718 guillotined chromosomes resulting from septal closing over nucleoids and aberrant nucleoid  
719 segregation patterns, respectively and typical example of chromosomal segregation defects is  
720 magnified. Scale bares are 5  $\mu\text{m}$ . **C) YqaH affects *dnaA* expression.** Cells harboring either the  
721 pDG148 or pDG148-*yqaH* were grown in LB in the presence of IPTG. RNAs from exponentially  
722 grown cells (OD600~0.3) were extracted and expression levels of the *dnaA* gene were monitored by  
723 qPCR in the presence (+) or absence (-) of YqaH (\*\*\* P<0.001).

724

### 725 Figure 3:

726 **YqaH triggers sporulation and Spo0A-related phenotypes. A-B) YqaH expression inhibits**  
727 **sporulation.** Cells carrying plasmids pDG148 (control) or pDG148-*yqaH* were grown in DSM  
728 media in the presence of IPTG (0.5 mM) added at the onset ( $t_0$ ) of sporulation. Sporulant cells were  
729 observed at different time after initiation of sporulation. **A)** Snapshot captures of light and  
730 fluorescence microscopy at indicated  $t_{\text{hrs}}$  time. Cells were stained with fluorescent membrane dye  
731 FM4-64 (left panel). **B)** Sporulating cells were quantified by monitoring asymmetric septa, engulfed  
732 forespore and free spores, in the presence (+) or absence (-) of YqaH. Ratio were determined from  
733 observation of > 500 cells over 2 independent experiments and 3 biological replicates per  
734 experiment. **C) YqaH affects expression Spo0A-regulated genes.** Cells harboring either the

735 pDG148 or pDG148-yqaH were grown in DSM. IPTG was. Expression levels of *spoIIE* and *spoIIGA*  
736 genes from the Spo0A regulon were monitored by real-time qPCR in the presence (+) or absence (-)  
737 of YqaH and expressed as relative expression ratio compared to control (-) (\*\*\*)  $P < 0.001$ ,  $n \geq 6$ ).  
738

#### 739 **Figure 4:**

740 **Restoration of replication initiation defects by YqaH\_DnaA LOI mutation.** Exponentially  
741 growing *B. subtilis* cells carrying either pDG148 (-), pDG148-yqaH (WT), pDG148-yqaH LOI  
742 mutant derivatives K17E or R56W were grown in the presence of IPTG and harvested at similar  
743 OD<sub>600</sub>~0.3 and assessed for various *dnaA*-related phenotypes: **(A) Nucleoid segregation and**  
744 **morphology.** Cells were treated with DAPI to reveal nucleoids (false-colored blue) and with the  
745 membrane dye FM4-64 (false colored red). **B-C-D) Analysis of DnaA-dependent replication**  
746 **initiation phenotypes.** **B)** Ori:ter ratio; Origin-proximal and Terminus proximal DNA sequences  
747 were quantified by qPCR. **C)** Visualization of origins foci in living cells. Origins are tagged through  
748 binding of the GFP-lacI repressor to LacO operator sequences inserted at proximal location from  
749 OriC. **D)** Averaged number of replication origins per cell determined as the number of LacI-GFP foci  
750 upon induced condition in control (-), WT and K17E- mutant derivative of YqaH. Statistical  
751 significance are illustrated by stars (t-test; . Ori:ter:  $n=6$ ; *dnaA* mRNA:  $n=12$ ;  $P < 0.01$  \*;  $P < 0.001$  \*\*).  
752 **E) Effect of YqaH LOI mutant on dnaA expression.** Cells harboring either the pDG148, pDG148-  
753 yqaHWT or K17E and R56W mutated derivatives were grown in LB in the presence of IPTG. RNAs  
754 from exponentially grown cells (OD<sub>600</sub>~0.3) were extracted and expression levels of the *dnaA* gene  
755 were monitored by qPCR in the presence (+) or absence (-) of YqaH (\*\*\*  $P < 0.001$ ).

756

#### 757 **Figure 5:**

758 **Role of K17E DnaA\_LOI substitution in sporulation and biofilm formation.** **A)** 168 and Tf8  
759 strains carrying plasmids pDG148 (control) or pDG148-yqaH and K17E mutant were grown in DSM  
760 media in the presence of IPTG (0.5 mM) added at the onset ( $t_0$ ) of sporulation. Sporulant cells were  
761 observed - hours after initiation of sporulation (as described in figure 3). **B)** Surface rendering of  
762 biofilms pellicles of 168 strain expressing yqaH or yqaH-K17E mutant after 48h in Mgss media.  
763 Biomass was averaged from 8 samples. Pairwise comparisons were performed using the Tukey  
764 Method (\* $p \leq 0.05$  \*\* $p \leq 0.01$  \*\*\* $p \leq 0.001$ ).

#### 765 **Table 1:**

766 **YqaH\_LOI mutational screen.** Aminoacid substitution affecting interaction with DnaA and/or  
767 DnaN are indicated with their associated interaction phenotype. (-) refers as a total loss of interaction  
768 phenotype leading to absence of growth on both -LUH and -LUA media. (+/-) refers as a partial loss  
769 of interaction leading to some growth on the -LUH but not -LUA; see also Figure S1 for additional  
770 explanation.

771

772 **Figure 1**

773

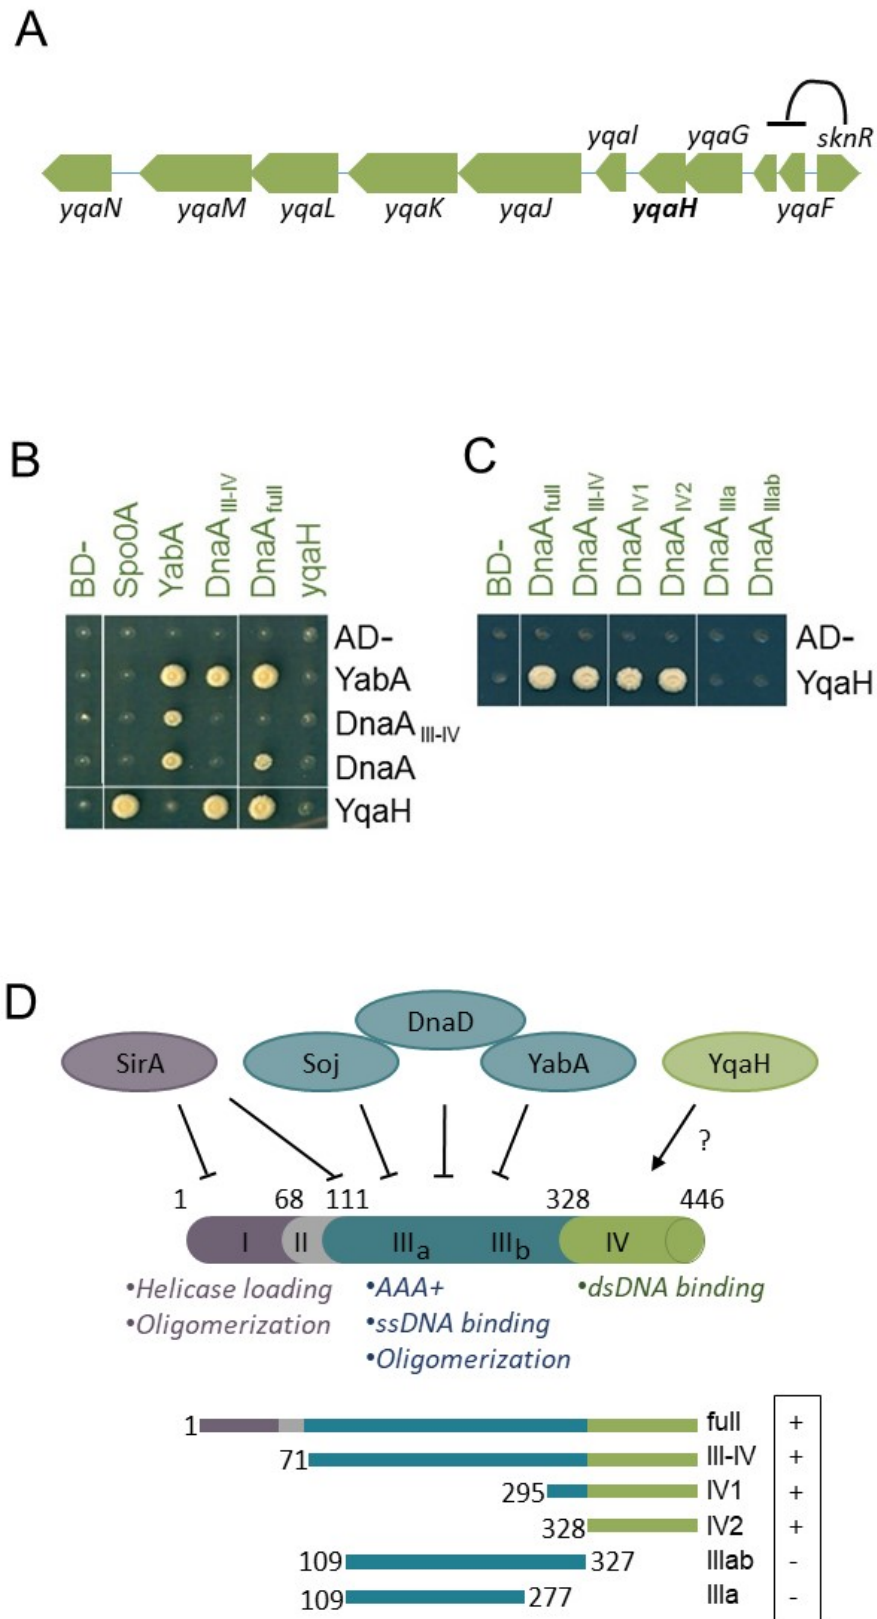

774 **Figure 2**

775

776

777

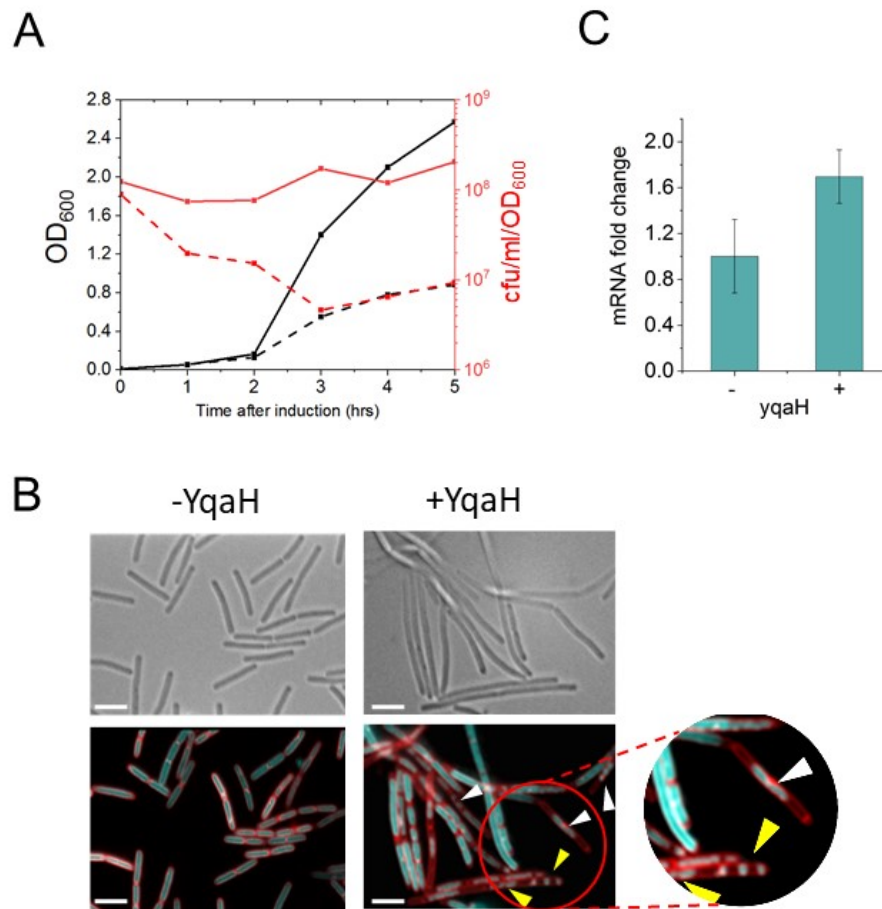

778 **Figure 3**

779

780

781

782

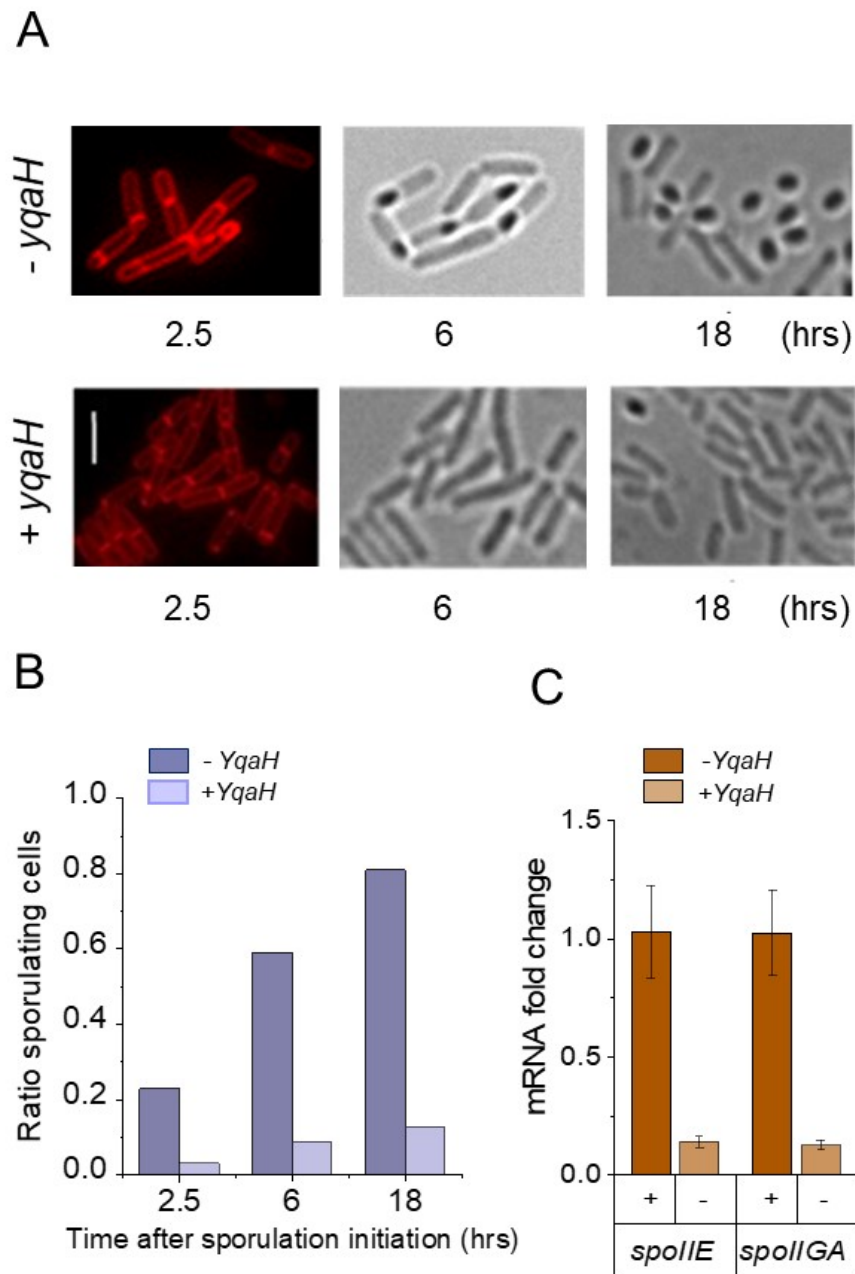



783 **Figure 4**

784

785

786

787

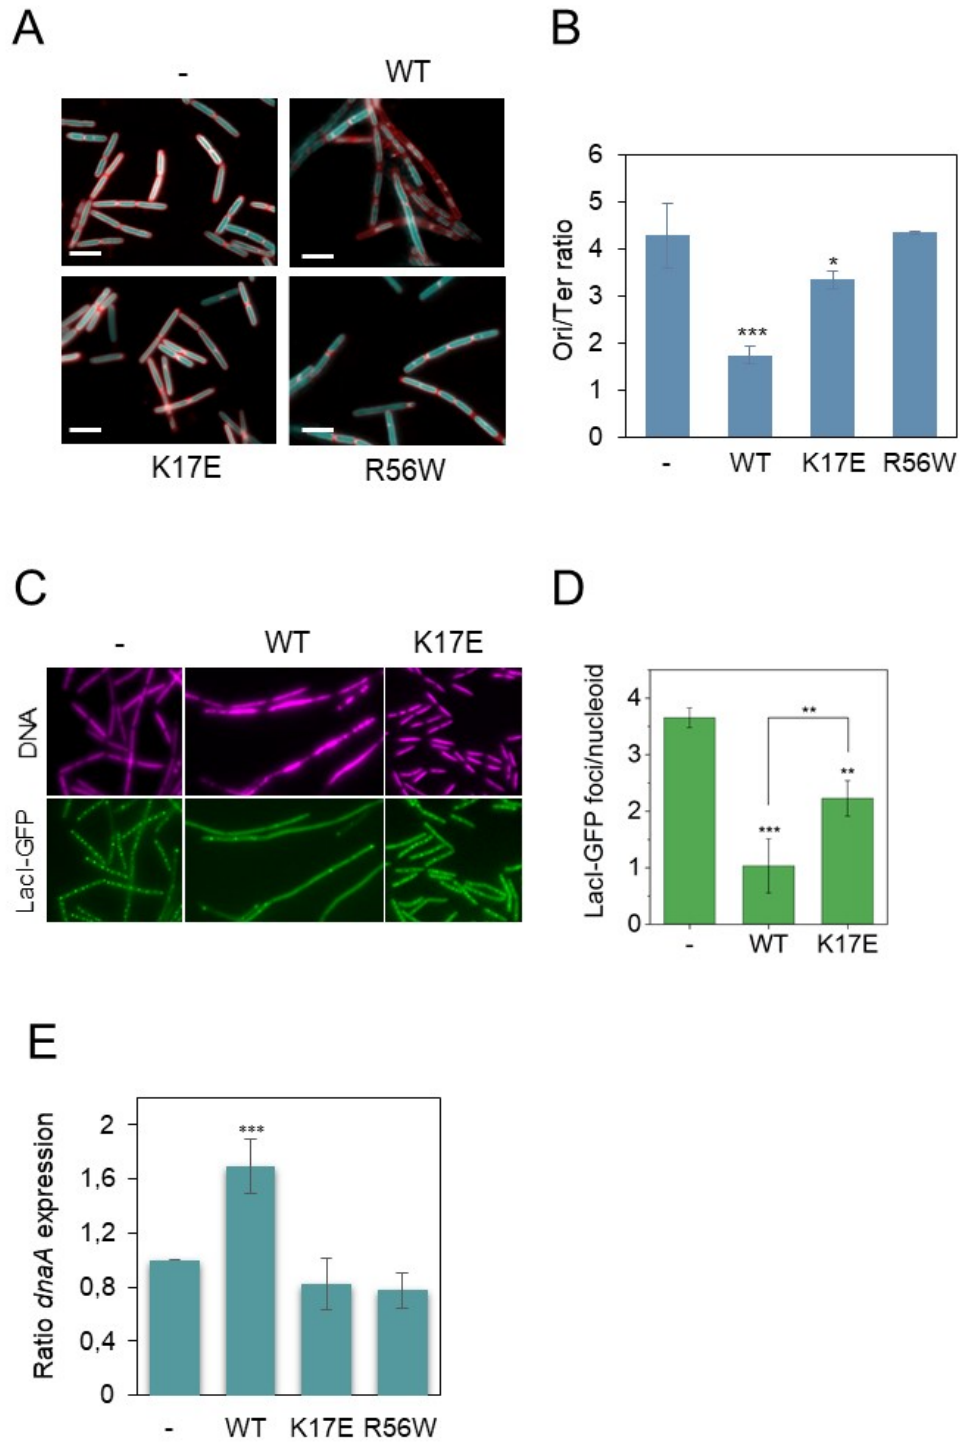

788 **Figure 5**

789

790

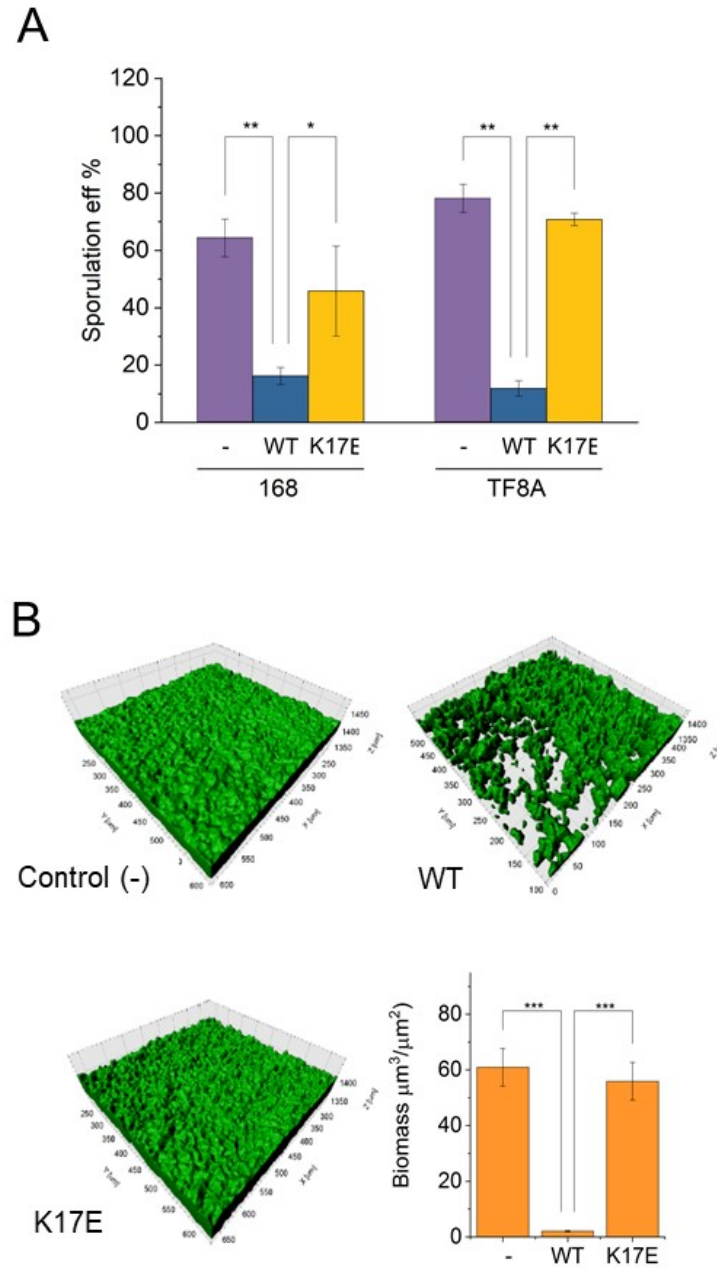

791 **Table 1**

792

|          |      | DnaA | Spo0A |
|----------|------|------|-------|
| YqaH_LOI | D10G | -    | -     |
|          | R16G | +/-  | +     |
|          | K17E | -    | +     |
|          | S20L | -    | -     |
|          | S25T | +/-  | +/-   |
|          | M27T | +/-  | +     |
|          | L28P | -    | -     |
|          | Y37H | +/-  | +     |
|          | E38K | -    | +     |
|          | E38V | +/-  | +     |
|          | A40T | +/-  | +/-   |
|          | L43P | -    | -     |
|          | A44V | +/-  | +     |
|          | K48E | -    | +     |
|          | R56W | -    | +     |
| L57P     | -    | -    |       |

793

794

795

796

797
